## 12 **Summary**

13           Accumulating evidence in several model organisms indicates that reduced sphingolipid  
14 biosynthesis promotes longevity, although underlying mechanisms remain unclear. In yeast,  
15 sphingolipid depletion induces a state resembling amino acid restriction, which we hypothesized  
16 may be due to altered stability of amino acid transporters at the plasma membrane. To test this,  
17 we measured surface abundance for a diverse panel of membrane proteins in the presence of  
18 myriocin, a sphingolipid biosynthesis inhibitor. Unexpectedly, we found that surface levels of  
19 most proteins examined were either unaffected or increased during myriocin treatment,  
20 consistent with an observed decrease in bulk endocytosis. In contrast, sphingolipid depletion  
21 triggered selective endocytosis of the methionine transporter Mup1. Unlike methionine-induced  
22 Mup1 endocytosis, myriocin triggers Mup1 endocytosis that requires the Rsp5 adaptor Art2, C-  
23 terminal lysine residues, and the formation of K63-linked ubiquitin polymers. These findings  
24 reveal cellular adaptation to sphingolipid depletion by ubiquitin-mediated remodeling of nutrient  
25 transporter composition at the cell surface.

26 **Keywords**

27 Sphingolipid metabolism; endocytosis; endocytic adaptors; amino acid transporters; methionine

28 transport; glucose transport; alpha-arrestins; ubiquitin; myriocin

29

## 30 Introduction

31 Sphingolipids (SLs) are a diverse class of lipids that serve as a structural component of  
32 eukaryotic membranes but also have important regulatory functions related to cell signaling. The  
33 first steps of SL biosynthesis occur in the ER and result in the production of ceramide, which is  
34 then transported to the Golgi complex for further modification into complex SLs. These complex  
35 SLs are then transported to different membranes throughout the cell where they serve a  
36 multitude of functions [1]. For example, sphingomyelin regulates sorting of specific secretory  
37 cargo in the trans-Golgi network of mammalian cells [2, 3]. In the plasma membrane (PM) of  
38 mammalian cells, sphingosine 1-phosphate is generated and can be secreted to act as a  
39 signaling molecule that mediates complex processes including vascular development and  
40 coordination of immune responses [4]. In yeast, sphingolipids at the PM regulate the activation  
41 of TORC2 [5]. Indeed, the variety of regulatory functions served by SLs is underscored by their  
42 important role in processes that range from memory and cognition [6] to the progression of  
43 cancer [7, 8].

44 Myriocin (Myr) is a potent inhibitor of serine palmitoyltransferase (SPT) which catalyzes  
45 the first step of SL biosynthesis and increases lifespan in a variety of model organisms [9].  
46 There is a growing body of data showing that Myr treatment reduces the severity of age-related  
47 diseases in mice and rats, including atherosclerosis and cardiac impairment [10-13], factors for  
48 metabolic syndrome, obesity, diabetes and cancer [14-18], amyloid beta and tau  
49 hyperphosphorylation in Alzheimer's disease [19] and other neurodegenerative diseases [20,  
50 21]. Despite its therapeutic potential, it remains unclear how dampening SL biosynthesis confers  
51 these health benefits to enhance longevity.

52 Perturbations that alter sphingolipid homeostasis have complex effects on cellular  
53 processes. By characterizing how *Saccharomyces cerevisiae* yeast cells respond and adapt to  
54 Myr treatment, we have worked to understand how sphingolipid depletion promotes longevity.  
55 Recently, we reported that Myr-treated yeast cells experience a state resembling amino acid



56 restriction, which is associated with decreased uptake of amino acids from the media into the  
57 cell [22]. We also reported that Myr triggered the endocytic clearance of the high affinity  
58 methionine transporter Mup1 [22]. Based on these prior results, we hypothesized that  
59 sphingolipid depletion may trigger broad endocytic clearance of various nutrient transporters.  
60 Here, we tested this hypothesis by measuring the surface abundance of a diverse panel of PM  
61 proteins – including amino acid transporters, hexose transporters, proton pumps, and signaling  
62 receptors. We report that, for most proteins examined, sphingolipid depletion either increases  
63 the PM abundance or has no apparent effect on subcellular distribution. Consistent with these  
64 observations, we found that Myr inhibits bulk endocytosis while simultaneously triggering  
65 selective endocytic clearance of Mup1. We also address the mechanism of Myr-mediated Mup1  
66 endocytosis, which is mechanistically distinct from methionine-induced Mup1 endocytosis.  
67 These studies are crucial to understanding how Myr treatment leads to a state of amino acid  
68 restriction, and they provide new insights into how the PM is remodeled in response to  
69 sphingolipid depletion.

70

71

## 72 **Results**

### 73 **Myriocin triggers remodeling of AAT composition at the PM**

74 Our previous finding that Myr treatment generally decreases the intracellular pool of  
75 amino acids as well as the rate of amino acid uptake [22] raised the possibility that gradual  
76 sphingolipid depletion alters the composition of amino acid transporters (AATs) at the PM. To  
77 explore this possibility, we examined cells harboring chromosomal mNeonGreen (mNG) fusions  
78 to a panel of AAT genes (*MUP1*, *CAN1*, *DIP5*, *LYP1*, *BAP2*, *BAP3*, *GNP1*, *HIP1*, *GAP1*, and  
79 *TAT2*) in wildtype (SEY6210) and Vph1-mCherry (a protein localized to the limiting membrane  
80 of the vacuole) expressing background strains. Cells at mid-log phase were treated with Myr  
81 (400 ng/mL) or mock-treated (solvent) for 5 hours and mixed just prior to visualization by  
82 fluorescence microscopy. Vph1-mCherry expression was used to identify cells that had been  
83 Myr-treated, while mock treatment was performed on cells lacking any mCherry expression.  
84 Quantification of images was performed by measuring mean fluorescence intensity at the PM of  
85 individual cells. This analysis revealed that Myr treatment did not significantly alter PM levels of  
86 Can1, Dip5, Lyp1, Bap2, Gnp1, or Hip1 (**FIG 1A-B** and **FIG S1A-C**). (In the conditions of this  
87 experiment, Gap1 was predominantly vacuole-localized in both mock-treated and Myr-treated  
88 cells (**FIG S1A**), and thus localization to the PM could not be quantified.) In contrast, increased  
89 levels of Bap3 and Tat2 at the PM were observed in Myr-treated cells (**FIG 1A-B**). Consistent  
90 with previously reported results, Myr-treated cells exhibited decreased Mup1-mNG at the PM  
91 and increased Mup1-mNG flux into the vacuole (**FIG 1A-B**). Taken together, these results  
92 indicate that sphingolipid depletion induces a selective endocytic clearance of the methionine  
93 transporter, Mup1.

94

### 95 **Yeast cells respond to Myr by increasing abundance of specific glucose transporters**

96 Given that yeast cells respond to Myr by altering the PM composition of AATs we  
97 considered the possibility that other nutrient transporters may also be affected. Specifically,

98 given the relationship between glucose metabolism and aging, we hypothesized that Myr  
99 treatment may alter composition or activity of glucose transporters. To examine the effect of Myr  
100 on glucose transport, yeast cells were incubated with radiolabeled  $^3\text{H}$ -glucose and uptake was  
101 measured with or without Myr treatment. Notably, glucose uptake capacity was reduced in cells  
102 treated with Myr for at least 2 hours (**FIG 2A**). To determine if Myr treatment affects the  
103 abundance of glucose transporters at the PM, we examined cells harboring chromosomal  
104 mNeonGreen (mNG) fusions to a panel of four hexose transporter genes (*HXT1*, *HXT2*, *HXT3*,  
105 *HXT6*) in wildtype (SEY6210) and vacuolar Vph1-mCherry-expressing background strains. Cells  
106 were grown to mid-log phase, treated with Myr or mock-treated for 5 hours and mixed just prior  
107 to visualization by fluorescence microscopy (as described in **FIG 1**). We found that Myr  
108 treatment had no effect on the PM abundance of Hxt3 or Hxt6, while the low-affinity glucose  
109 transporter Hxt1 and the high-affinity glucose transporter Hxt2 exhibited increased abundance  
110 at the PM (**FIG 2B-C** and **FIG S2A-B**). Thus, Myr-treated cells selectively increase PM  
111 abundance of specific hexose transporters, while experiencing decreased capacity for glucose  
112 uptake. These results are unexpected and suggest impaired or suppressed activity of glucose  
113 transporters in sphingolipid-depleted cells.

114 We expanded our analysis to include other categories of integral membrane proteins at  
115 the PM. Myr-treatment resulted in a slight (but statistically insignificant) decrease in the PM  
116 abundance of Pma1, a P2-type ATPase that pumps protons out of the cell (**FIG S2C-D**). Myr  
117 treatment induced a correspondingly slight (but statistically significant) increase in the PM  
118 abundance of Pma2 (**FIG S2C-D**), a paralog of Pma1. While these changes were subtle, Myr  
119 treatment induced more substantial increases in the abundance of other proteins at the PM. For  
120 example, the pheromone receptor Ste2 exhibited largely vacuolar localization in mock-treated  
121 cells but localized to the PM in Myr-treated cells (**FIG S2C-D**) suggesting that Myr treatment  
122 interferes with constitutive endocytic trafficking of Ste2. Similar results were observed for the  
123 stress-sensing signal transducer Wsc1 (**FIG S2C-D**). Interestingly, Myr treatment also increased

124 the PM abundance of the ABC family multidrug transporter Pdr5 (**FIG S2C-D**). A summary of  
125 the Myr treatment response of all integral PM proteins examined is provided in **Table 1**.

126

### 127 **Myriocin decreases the bulk inflow of the PM**

128 Since several PM proteins accumulated at the PM following Myr treatment we  
129 hypothesized this may be due to a decrease in bulk endocytosis. To measure bulk endocytosis,  
130 the lipophilic tracer dye FM4-64 (N-(3-triethylammoniumpropyl)-4-(p-  
131 diethylaminophenylhexatrienyl) pyridium dibromide) was added to pulse-label the PM, followed  
132 by washing and chasing for 1 hour. Bulk endocytosis results in most FM4-64 being delivered to  
133 the limiting membrane of the vacuole (labelled by Vph1-mNG) in mock-treated cells (**FIG S3A-**  
134 **B**). In contrast, cells treated with Myr for 4 hours exhibited reduced colocalization of FM4-64  
135 with Vph1-mNG (**FIG 3A-B** and **FIG S3C-D**), indicating a significant reduction in bulk  
136 endocytosis. Notably, treatment of cells with Myr for 1 hour had no effect on bulk endocytosis,  
137 while Myr treatment for 2 hours resulted in a partial but significant defect in bulk endocytosis  
138 (**FIG 3A-B**). This defect in bulk endocytosis after 4 hours of Myr treatment likely contributes to  
139 the accumulation of various PM proteins in the PM (**Table 1**). Given that Myr treatment impairs  
140 bulk endocytosis, it is striking that the methionine transporter Mup1 undergoes selective  
141 endocytic clearance on the same time scale (**FIG 1** and **Table 1**). We set out to understand the  
142 mechanistic basis for selective endocytosis of Mup1 in Myr-treated cells.

143

### 144 **Myriocin-induced trafficking of Mup1 requires the Rsp5 adaptor Art2**

145 To better understand how Myr triggers the selective endocytic clearance of Mup1, we  
146 first attempted to validate our findings using yeast cells with chromosomal *MUP1* fused at its C-  
147 terminus to superecliptic pHluorin, a GFP variant that does not fluoresce in the acidic  
148 environment of the vacuole [23]. In this yeast variant, steady state levels of Mup1 at the PM can  
149 be measured by flow cytometry [24]. Similar to our fluorescence microscopy results, this

150 approach revealed Mup1 levels at the PM begin to decrease after 4 hours of Myr treatment (**FIG**  
151 **4A**). To test whether this response is due to sphingolipid depletion, we cultured yeast cells in  
152 media supplemented with phytosphingosine (PHS), providing an intermediate product of the SL  
153 biosynthesis pathway which effectively bypasses the Myr-imposed enzymatic block. Notably,  
154 PHS supplementation prevented the Myr-induced endocytosis of Mup1 (**FIG 4B**), indicating this  
155 response is the result of sphingolipid depletion. Similar to Myr, aureobasidin (AbA), which  
156 inhibits the inositol phosphorylceramide synthase AUR1, also triggered the clearance of Mup1,  
157 an effect which could not be reversed by PHS supplementation (**FIG 4B**). Since PHS  
158 supplementation does not bypass the AbA enzymatic block, these results reveal that PM  
159 clearance of Mup1 is triggered by depletion of complex SLs which are synthesized downstream  
160 of ceramide (e.g., inositol phosphorylceramides and their mannosylated derivatives).

161 The endocytosis of nutrient transporters in yeast is controlled primarily by Rsp5-  
162 mediated ubiquitylation events (reviewed in [25]). Pairing of the E3 ubiquitin ligase Rsp5 with  
163 cargo adaptors called ARTs (arrestin-related trafficking adaptors) determines the specificity of  
164 substrate targeting and promotes adaptation to nutrient fluctuations and stress conditions [26,  
165 27]. Analysis of the yeast transcriptional response to Myr treatment [28] revealed increased  
166 transcript abundance for Rsp5 and several ARTs (**FIG S4A-B**), indicating that sphingolipid  
167 depletion alters gene expression in a way that could affect endocytic trafficking. To determine if  
168 these transcript-level changes underlie alterations at the protein level, we quantified the  
169 abundance of mNG C-terminal fusions to various ART proteins (expressed from endogenous  
170 chromosomal loci) using total fluorescence measurements (**FIG S4C**). Myr-induced changes in  
171 transcript and protein levels correlated in many cases (e.g., ART1 and ART2) but not in every  
172 case (e.g., ART4). Notably, both *ART1* and *ART2* were upregulated in a Myr-treatment time  
173 course (**FIG S4A-C**) and both are known to regulate Mup1 endocytosis in response to excess  
174 methionine [27, 29] and nitrogen starvation [30], respectively. To test if ARTs are involved in this  
175 response, we characterized Myr-triggered Mup1-pHluorin clearance in a panel of ART deletion

176 yeast strains and found that all ARTs tested were dispensable except for *ART2* (**FIG 4C**). To  
177 validate this result, we performed fluorescence microscopy to compare the PM abundance of  
178 Mup1-pHluorin in wildtype,  $\Delta art1$  or  $\Delta art2$  yeast cells. Strikingly, Mup1 clearance was not  
179 detected in Myr-treated  $\Delta art2$  yeast cells, while loss of ART1 did not affect this response (**FIG**  
180 **4D-E**). These findings indicate that Art2 mediates the endocytic clearance of Mup1 in response  
181 to Myr treatment.

182 Previous work demonstrated that nitrogen starvation triggers Art2-dependent  
183 endocytosis of Mup1 which required transcriptional induction of Art2 by activation of the general  
184 amino acid starvation response [30]. This stress response requires activity of the upstream  
185 activating kinase Gcn2, which phosphorylates eIF2 $\alpha$  to mediate the response. We hypothesized  
186 that Myr-triggered endocytosis of Mup1 may likewise occur through activation of the general  
187 amino acid starvation response and subsequent up-regulation of Art2. To test this, we  
188 compared Myr-triggered Mup1 endocytosis in wildtype and  $\Delta gcn2$  mutant cells. Unexpectedly,  
189 we found that Gcn2 is dispensable for Myr-triggered endocytosis of Mup1 (**FIG S5**). Thus, in  
190 contrast to Mup1 endocytosis that occurs during nitrogen starvation [30], Myr-induced  
191 endocytosis of Mup1 occurs independently of the general amino acid starvation response.

192

### 193 **Myr-induced trafficking of Mup1 requires C-terminal Lys63-linked polyubiquitylation**

194 Ubiquitylation at N-terminal lysines (K27 and K28) is required for Mup1 endocytosis in  
195 response to excess methionine [31-33] while ubiquitylation at C-terminal lysines (K567 and  
196 K572) is reported to mediate endocytic clearance in response to nitrogen starvation [30].  
197 Structure predictions from the AlphaFold protein structure database indicate that the N-terminal  
198 ubiquitylation sites (K27 and K28) exist in a largely unstructured region, while the C-terminal  
199 ubiquitylation sites (K567 and K572) occur in an alpha-helical region (**FIG 5A**). Since Art1-  
200 mediated ubiquitylation of Mup1 occurs at N-terminal lysines (K27 and K28) and Art2 was  
201 previously reported to bind at the C-terminus of Mup1 [30] we predicted that ubiquitylation of C-

202 terminal lysine residues may be required for Myr-induced endocytosis of Mup1. To test this  
203 prediction, we characterized Myr-induced trafficking of Mup1-mNG in strains with short C-  
204 terminal truncations lacking one or both C-terminal lysine residues ( $\Delta$ K572 and  $\Delta$ K567,  
205 respectively) (**FIG 5B**). While Mup1 <sup>$\Delta$ K572</sup>-mNG exhibited Myr-induced endocytic clearance,  
206 Mup1 <sup>$\Delta$ K567</sup>-mNG was unresponsive to Myr treatment (**FIG 5C-D**). These results suggest that  
207 Myr-triggered Mup1 endocytosis requires ubiquitylation at its C-terminal lysine residues.

208 To measure the ubiquitylation of Mup1, we affinity purified Mup1-FLAG from yeast  
209 lysates and analyzed it by SDS-PAGE and quantitative immunoblotting. This analysis revealed  
210 a significant increase in K63-linked ubiquitin polymers associated with Mup1 in response to Myr  
211 treatment (**FIG 5E**). Previous work demonstrated that conjugation to monoubiquitin is sufficient  
212 for Mup1 endocytosis in response to excess methionine [34]. In contrast, we found that yeast  
213 cells expressing Ub<sup>K63R</sup> as the sole source of ubiquitin were deficient for Myr-triggered  
214 endocytosis of Mup1 (**FIG 5F-H**), indicating that K63-linked ubiquitin polymers are required for  
215 this response. Taken together, our results reveal that Myr-induced endocytosis of Mup1 is  
216 ubiquitin-mediated but proceeds by a mechanism that is distinct from methionine-induced  
217 endocytosis.

218

### 219 **Ede1 and Ent1 function redundantly in Myr-mediated Mup1 endocytic clearance**

220 Multiple ubiquitin-binding proteins in yeast, including the epsins Ent1 and Ent2 and the  
221 epsin-like Ede1, function as adaptors that capture ubiquitylated cargoes during endocytic  
222 vesicle formation. Among these, Ede1 was previously found to be crucial in mediating Mup1  
223 trafficking in response to excess methionine [35]. To examine a role for endocytic adaptors in  
224 the cellular response to Myr we analyzed the abundance of mNG C-terminal fusions to  
225 endocytic adaptor proteins (expressed from endogenous chromosomal loci) using total  
226 fluorescence measurements. This analysis revealed significant Myr-triggered increases in  
227 protein levels of Ent1 and Ede1 while no significant change in the level of Ent2 was detected

228 **(FIG 6A)**. We next measured co-localization between endocytic adaptors and Mup1 in response  
229 to Myr treatment. This analysis revealed that Myr treatment induced co-localization of Mup1 with  
230 Ent1 and Ede1, but not Ent2 **(FIG 6B)**. Importantly, we did not observe significant changes for  
231 Ede1 co-localization with either Can1 (an arginine transporter) or Pil1 (an eisosome component)  
232 during the same time course **(FIG S6B)**. To determine if the increased association between  
233 Mup1 and Ede1 was due to ubiquitin binding, we analyzed association between Mup1-mNG and  
234 a variant of Ede1 lacking its C-terminal UBA domain, which is known to preferentially interact  
235 with K63-linked polymers [36]. Notably, the Ede1<sup>Δuba</sup> variant did not exhibit increased  
236 association with Mup1 in response to Myr treatment **(FIG 6C)**. Finally, we analyzed Myr-  
237 triggered Mup1 trafficking in yeast strains lacking endocytic adaptors. This analysis revealed  
238 that Ent1, Ent2 and Ede1 are all individually dispensable for Myr-induced Mup1 trafficking,  
239 despite the fact that loss of Ede1 is sufficient to prevent methionine-triggered Mup1 endocytosis  
240 **(FIG S6C and [35])**. Analysis of double mutants revealed that Myr-triggered Mup1 endocytosis  
241 occurs normally in  $\Delta ent2\Delta ede1$  cells but is blocked in  $\Delta ent1\Delta ede1$  cells **(FIG 6D-F)**. (Notably,  
242  $\Delta ent1\Delta ent2$  double mutant yeast cells are inviable [35] and thus could not be tested in our  
243 analysis.) These data reveal that Ent1 and Ede1 contribute redundantly to Mup1 clearance in  
244 response to Myr treatment.

245

246



## 247 **Discussion**

248 It is well-established that genetic and pharmacological interventions that perturb  
249 sphingolipid biosynthesis promote longevity in a variety of model organisms [9], although how  
250 sphingolipid homeostasis and life span are coupled is not fully understood. Previously, we have  
251 reported that sphingolipid reduction in yeast extends chronological life span [37] and that this is  
252 associated with a state of amino acid restriction, which is accomplished at least in part by  
253 decreasing the uptake of extracellular amino acids [22]. Here, we report the unexpected result  
254 that, for almost all nutrient transporters and PM-associated proteins examined, Myr treatment  
255 either had no effect or increased abundance at the PM (**Table 1**). The only exception was  
256 Mup1, which undergoes endocytic clearance following 4 hours of Myr treatment (**FIG 4**). Thus,  
257 the observed decrease in abundance of most amino acids observed upon Myr treatment is not  
258 likely due to broad endocytic clearance of AATs, and in fact occurs despite the increased PM  
259 abundance of Bap3 and Tat2. Similar results were observed for hexose transporters, some of  
260 which accumulated at the PM despite decreased glucose uptake during a Myr treatment time  
261 course. One possible explanation for this apparent disparity is that sphingolipid depletion may  
262 lower transport activity without inducing endocytosis. In some cases, the accumulation of  
263 specific PM proteins following Myr treatment may be due to inhibition of bulk endocytosis, which  
264 was observed using FM4-64 trafficking assays (**FIG 3**). Alternatively, it is also possible that cells  
265 respond to decreased amino acid and glucose availability by upregulating the biosynthesis and  
266 secretion of specific nutrient transporters. Our analysis suggests that the activities of many  
267 nutrient transporters are coupled to sphingolipid abundance at the PM, and future studies will  
268 need to address mechanism of this coordination.

269 The methionine transporter Mup1 was unique amongst PM proteins in being selectively  
270 targeted for endocytic clearance following sphingolipid depletion. More specifically, our finding  
271 that both Myr and AbA triggered Mup1 endocytosis, but addition of PHS only suppressed the  
272 effect of Myr and not the effect of AbA, indicates that depletion of inositol phosphorylceramides

273 (and/or downstream products) triggers Mup1 endocytosis. The mechanism of methionine-  
274 induced endocytosis of Mup1 is well-characterized [31, 34, 35, 38]: **(i)** it involves ubiquitylation  
275 of N-terminal lysine residues by the Art1-Rsp5 E3 ubiquitin ligase complex, **(ii)** it occurs  
276 independently of ubiquitin polymer formation, and **(iii)** it requires the endocytic adaptor Ede1. In  
277 contrast, we find that Myr-induced endocytosis of Mup1 **(i)** is mediated by the Art2-Rsp5 E3  
278 ubiquitin ligase complex, **(ii)** requires C-terminal lysine residues, **(iii)** requires the formation of  
279 K63-linked ubiquitin polymers, and **(iv)** requires either Ede1 or Ent1 as an endocytic adaptor.  
280 Furthermore, Myr treatment induces co-localization of Mup1 with Ent1 and Ede1, and the Mup1-  
281 Ede1 co-localization requires its C-terminal UBA domain, which is known to interact with  
282 ubiquitin. Thus, the mechanism of Myr-triggered Mup1 endocytosis is mechanistically distinct  
283 from methionine-mediated Mup1 endocytosis (**Fig. 7**).

284       Importantly, Mup1 endocytosis has also been reported to occur during cellular  
285 adaptation to other stresses and environmental changes. Endocytosis of many PM proteins,  
286 including Mup1, occurs in response to depletion of nicotinic acid by a mechanism that relies on  
287 tetraspan Cos proteins but is distinct from known ART-Rsp5 complexes [39]. Another recent  
288 study reported that nitrogen starvation triggers endocytosis of multiple AATs – including Mup1,  
289 Can1, Lyp1, Tat2 – as well as glucose transporters Hxt1, Hxt2, and Hxt3 [30]. The nitrogen  
290 starvation-induced endocytosis of Mup1 and several other AATs (Can1, Lyp1, and Tat2) was  
291 Art2-dependent and required Gcn2-dependent induction of Art2 expression [30]. Although both  
292 nitrogen starvation and sphingolipid depletion induce Art2-dependent endocytosis of Mup1,  
293 there are two notable mechanistic distinctions. First, while nitrogen starvation induces Art2-  
294 mediated endocytosis of multiple nutrient transporters, the endocytosis induced by sphingolipid  
295 depletion is very selective for Mup1. Indeed, some nutrient transporters like Tat2, Hxt1 and Hxt2  
296 were internalized during nitrogen starvation but accumulated at the PM in response to  
297 sphingolipid depletion. Second, while Gcn2 is required for Mup1 endocytosis during nitrogen  
298 starvation [30] it is dispensable for Myr-triggered Mup1 endocytosis (**FIG S5**). These distinctions

299 indicate that Art2 is broadly activated in a Gcn2-dependent manner in response to nitrogen  
300 starvation, but that its Gcn2-independent activation during sphingolipid depletion is restricted to  
301 Mup1. Together, these results reveal distinct PM remodeling processes that occur during  
302 cellular adaptation to nitrogen starvation or to sphingolipid depletion.

303           It remains unclear why the methionine transporter Mup1 is selectively targeted for  
304 endocytic clearance following sphingolipid depletion, and we hypothesize that altered  
305 methionine homeostasis may be critical for Myr-mediated longevity. In support of this  
306 hypothesis, we recently reported that artificial stabilization of Mup1 at the PM suppresses the  
307 longevity-enhancing effects of sphingolipid depletion [28]. This is consistent with a recent study  
308 which reported that decreased intracellular methionine concentration mediates life span  
309 extension associated with caloric restriction [40]. Collectively, these studies underscore the  
310 critical importance of methionine metabolism as a determinant of aging, and they suggest  
311 commonalities between life span extension associated with caloric restriction and sphingolipid  
312 depletion. Ultimately, improved understanding of cellular adaptation to sphingolipid depletion,  
313 particularly with respect to PM transport functions that regulate intracellular nutrient  
314 concentrations, will reveal how compounds like myriocin promote health and longevity.

315

316

317 **Materials and Methods**

318

319 **Strains, media and growth conditions**

320 *Saccharomyces cerevisiae* strains expressing endogenous reporter proteins fused with  
321 fluorescent proteins were generated by homologous recombination or mating. Cells in synthetic  
322 complete dextrose (SCD) media (preparation described in Hepowit et al. 2022) were grown at  
323 26°C with agitation (220 rpm) to mid-log phase (OD600 = 0.3 – 0.6) and treated with 400 ng·mL<sup>-1</sup>  
324 <sup>1</sup> myriocin (Cayman Chemical Company), Aureobasidin A (TaKaRa), phytosphingosine (Tokyo  
325 Chemical Industry), or mock solution (95% ethanol) as needed. Cells expressing Hip1-mNG  
326 were cultured in low-histidine SCD (2 µg·mL<sup>-1</sup>), while strains expressing Hxt6-mNG and Hxt7-  
327 mNG were grown in low-glucose SCD (0.2% glucose).

328

329 **Fluorescence Microscopy**

330 Yeast cells endogenously expressing fluorescent fusion proteins (mNG, MARS or mCherry)  
331 were grown to mid-log phase in indicated SCD broth, treated with Myr for 5 h, concentrated by  
332 centrifugation (3,500 X g for 10 s), and visualized using a DeltaVision Elite Imaging system  
333 (Olympus IX-71 inverted microscope; Olympus 100× oil objective (1.4 NA); DV Elite sCMOS  
334 camera, GE Healthcare). For the bulk endocytosis experiments using the 4-[6-[4-  
335 (diethylamino)phenyl]-1,3,5-hexatrien-1-yl]-1-[3-(triethylammonio)propyl]-pyridiniumbromide dye  
336 (FM 4-64, Invitrogen), the cells were prepared as previously described [41]. Fluorescence  
337 colocalization was measured using Pearson correlation coefficients analyzed by the Softworx  
338 software (GE Healthcare). Images obtained from the red and green filter channels were merged  
339 and the background-subtracted mean fluorescence at the plasma membrane was measured  
340 using Fiji [42].

341

342

## 343 **Flow Cytometry**

344 The endocytic trafficking of Mup1-pHluorin was analyzed using a flow cytometer as previously  
345 described [22, 43] with minor modifications. Briefly, cells endogenously expressing Mup1-  
346 pHluorin were grown to mid-log phase, treated with Myr or AbA, or in combination with PHS for  
347 5 h, and analyzed using the BD Accuri™ C6 Plus Flow Cytometer. The flow was set in fast  
348 fluidics and the relative intensity of Mup1-pHluorin in 10,000 cells was measured in the FITC  
349 channel using 90% histogram gating of the mock-treated cells for signal normalization.

350

## 351 **Western Blotting**

352 Endogenously expressed Mup1-FLAG was isolated by anti-FLAG immunoprecipitation as  
353 previously described [44], dissolved in urea sample buffer containing 10%  $\beta$ -mercaptoethanol,  
354 and resolved in 12% Bis-Tris PAGE gel by electrophoresis. Proteins were transferred onto  
355 PVDF membrane (0.45  $\mu$ m, GE Healthcare Amersham) by electrophoretic transblotting, blocked  
356 with 3% bovine serum albumin, and incubated with the following primary antibodies: anti-FLAG  
357 (1:1,000; Sigma; Mab), anti-ubiquitin (1:10,000; LifeSensors; Mab; clone VU-1), anti-K63  
358 (1:1,000; EMD Millipore, RAb; clone apu3). Secondary antibodies used were anti-mouse (IRDye  
359 680RD-goat anti-mouse; LI-COR) and anti-rabbit (IRDye 800CW-goat anti-rabbit; LI-COR).  
360 Fluorescence of blots was visualized using the Odyssey CLx Imaging System (LI-COR) and  
361 quantified using Image Studio Lite (LI-COR).

362

## 363 **RNA seq analysis**

364 Total RNA was isolated from the lysate of 5 OD<sub>600</sub> unit of cells, sampled every 1 h increment of  
365 Myr treatment (up to 6 h), using the RNAeasy Mini Kit (Qiagen, Maryland). RNA samples were  
366 frozen in dry-ice ethanol bath and stored at -80°C until use. RNA seq was performed at the J.  
367 Carver Biotechnology Center at the University of Illinois and data are deposited in the Gene  
368 Expression Omnibus (GSE199904; NCBI tracking system #22817261).

369 **Figure Legends**

370 **Figure 1.** Myr treatment selectively decreases the level of the primary methionine permease,  
371 Mup1, at the plasma membrane.

- 372 (A) Mixed population of yeast cells, expressing select mNG-tagged amino acid transporters  
373 (AATs), visualized under a fluorescence microscope after treatment with Myr ( $400 \text{ ng} \cdot \text{mL}^{-1}$ ) or mock solution (95% ethanol). Vph1 is a vacuolar marker used to distinguish the two  
374 yeast populations in a mixture visualized at 0 h and 5 h after treatment.  
375  
376 (B) Quantification of the mean fluorescence intensity of select AAT-mNG at the PM, measured  
377 using Fiji ( $n = 30 - 60$  cells;  $\pm$ SD (error bars)).  
378  
379

380 **Figure 2.** Myr decreases the cellular uptake of glucose despite the enhanced stability of hexose  
381 transporters Hxt1 and Hxt2 at the plasma membrane.

- 382 (A) Time-course measurements of  $^3\text{H}$ -glucose uptake of cells treated with or without Myr.  
383 (B) Mixed population of yeast cells, expressing select mNG-tagged hexose transporters,  
384 visualized under a fluorescence microscope after treatment with Myr ( $400 \text{ ng} \cdot \text{mL}^{-1}$ ) or  
385 mock solution (95% ethanol). Vph1 is a vacuolar membrane marker used to distinguish  
386 the two yeast populations in a mixture visualized at 0 h and 5 h after treatment.  
387 (C) Quantification of the mean fluorescence intensity of select glucose transporters (C-term  
388 tagged with mNG) at the PM, measured using Fiji ( $n = 30 - 60$  cells;  $\pm$ SD (error bars)).  
389  
390

391 **Figure 3.** Myr inhibits the bulk endocytic trafficking of plasma membrane lipids.

- 392 (A) Fluorescence microscopy of cells showing bulk endocytic trafficking of PM lipids, which  
393 eventually fuse with the vacuolar membrane. PM lipids were stained with a red lipophilic  
394 dye, FM 4-64 (fluorescent red), and vacuolar membrane was marked with Vph1-mNG  
395 (fluorescent green). Cells were treated with  $400 \text{ ng} \cdot \text{mL}^{-1}$  Myr (for 0, 1, 2 or 4 hours), and  
396 the trafficking and vacuolar fusion of PM-derived lipids were determined after 1 hour of  
397 incubation with FM 4-64 in YPD media at  $30^\circ\text{C}$ .  
398 (B) Co-localization of FM 4-64 and Vph1-mNG measured as Pearson's Correlation Coefficient  
399 values using softWoRx (ver. 7.0.0).  
400  
401

402 **Figure 4.** Sphingolipid depletion induces the endocytic trafficking of Mup1, requiring the arrestin  
403 adaptor protein Art2.

- 404 (A) Mup1-pHluorin fluorescence decreasing at the PM after 4 h of Myr treatment as measured  
405 using a flow cytometer ( $n = 10,000$  cells;  $\pm$ SD (error bars)).  
406 (B) Phytosphingosine supplementation stabilizes Mup1-pHluorin at the PM of Myr-treated  
407 cells but not on Aureobasidin A (AbA)-treated cells. Mup1-pHluorin fluorescence signal at  
408 the PM of cells was measured by a flow cytometer after 5 hours of treatment (eight  
409 biological replicates;  $n = 10,000$  cells;  $\pm$ SD (error bars)). Myr and AbA inhibit the serine  
410 palmitoyl transferase (Lcb1/Lcb2 complex) and phosphatidylinositol:ceramide  
411 phosphoinositol transferase (Aur1), respectively, of the sphingolipid biosynthesis pathway.  
412 (C) *ART2* is required in Myr-induced endocytic trafficking of Mup1-pHluorin. Mup1-pHluorin  
413 fluorescence signal at the PM of cells was measured by a flow cytometer after 5 hours of  
414 treatment (four biological replicates;  $n = 10,000$  cells;  $\pm$ SD (error bars)).  
415 (D) Fluorescence microscopy showing that the  $\Delta art2$  null-deletion strain has stable Mup1-  
416 pHluorin signal at the PM after Myr treatment.  
417 (E) Quantification Mup1-pHluorin fluorescence at the PM of cells shown in Fig. 4D.  
418

419 **Figure 5.** Myr-induced trafficking of Mup1 requires K63-linked polyubiquitylation at the C-terminal  
420 lysines of Mup1.

- 421 (A) Diagram showing the lysine residues at the cytosolic region of PM-associated Mup1.  
422 (B) Diagram showing the C-terminal truncation variants of Mup1.  
423 (C) Fluorescence microscopy of mixed cell populations (mNG-tagged Mup1 wt and truncation  
424 variants) after 5 h of Myr treatment.  
425 (D) Quantification of Mup1-mNG expressed as mean fluorescence intensity at the PM of cells  
426 visualized in Fig. 5C.  
427 (E) Anti-FLAG and anti-K63 polyUb immunoblots of Mup1-FLAG enriched by anti-FLAG  
428 immunoprecipitation after 2 or 4 h of Myr treatment.  
429 (F) Flow cytometry of SUB280-derived cells (all four ubiquitin-coding genes deleted) that  
430 *trans*-express only the wt or K63R ubiquitin, and endogenously express Mup1-pHluorin  
431 after 5 hours treatment with or without Myr (four biological replicates; n = 10,000 cells;  
432  $\pm$ SD (error bars)).  
433 (G) Fluorescence microscopy showing that SUB280 cells expressing only the Ub K63R have  
434 more stable Mup1-mNG signal at the PM after Myr treatment.  
435 (H) Quantification of Mup1-mNG mean fluorescence intensity at the PM of cells shown in Fig.  
436 5G.  
437  
438

439 **Figure 6.** Myr-induced trafficking of Mup1 requires the ubiquitin-binding endocytic adaptor  
440 proteins Ent1 and Ede1.

- 441 (A) Myr increases the fluorescence level of Ent1-, Ent2-, and Ede1-mNG in cells. Total  
442 fluorescence intensity of Ent1-, Ent2-, or Ede1-mNG was measured using Fiji after 0 to 5  
443 hours of treatment (n = 30 cells;  $\pm$ SD (error bars)).  
444 (B) Myr increases the co-localization of Mup1-pHluorin with Ent1-, Ent2-, and Ede1-mCherry,  
445 or Mup1-mCherry with Ent1-, Ent2-, and Ede1-mNG after 5 hours of Myr treatment.  
446 (C) The ubiquitin-binding UBA domain of Ede1 is required in the induction of Mup1-  
447 mNG/Ede1-mCherry co-localization in response to 5-hour Myr treatment. Co-localization  
448 was measured in 30 cells and graphically presented as Pearson's Correlation Coefficient  
449 values.  
450 (D) Ent1 and Ede1 are required in Myr-induced trafficking of Mup1. The fluorescence of Mup1-  
451 pHluorin was measured in cells after 5 hours with or without Myr treatment (four biological  
452 replicates; n = 10,000 cells;  $\pm$ SD (error bars)).  
453 (D) Quantification of Mup1-pHluorin mean fluorescence intensity at the PM of cells after 5  
454 hours with or without Myr treatment (n = 30 cells;  $\pm$ SD (error bars)).  
455 (E) Fluorescence microscopy of wt and  $\Delta$ ent1 $\Delta$ ede1 cells expressing Mup1-pHluorin after five  
456 hours with or without Myr treatment.  
457

458 **Figure 7.** Model of Mup1 endocytic trafficking in response to excess methionine and sphingolipid  
459 depletion. The box insets highlight mechanistic distinctions between the two endocytic processes.  
460  
461



462 **Supplementary Figure Legends**

463

464 **Figure S1.** Microscopy of cells expressing endogenous mNG-tagged amino acid transporters  
465 (AATs) treated with or without Myr.

466 (A) Yeast cells expressing AAT Gnp1, Gap1 or Tat2 in a mixed population assay. Myr-treated  
467 cells express Vph1-mCherry as a vacuolar marker to distinguish from mock-treated  
468 unlabeled cells.

469 (B) Yeast cells expressing AAT Bap2 or Hip1 after 5 hours of treatment with or without Myr.  
470 Vph1-mCherry is used as a vacuolar marker.

471 (C) Mean fluorescence intensity of AATs at the PM measured on cells in Suppl. Fig 1A-B (n  
472 = 20 cells;  $\pm$ SD (error bars)).

473

474

475 **Figure S2.** Myr stabilizes a subset of integral proteins at the PM.

476 (A) Yeast cells expressing endogenous Hxt1-GFP treated with or without Myr in a mixed  
477 population microscopy assay. Mock-treated cells express Vph1-MARS as a red marker of  
478 vacuolar membranes, while Myr-treated cells have unlabeled vacuole.

479 (B) Mean fluorescence intensity of Hxt1-GFP at the PM of cells shown in Suppl. Fig. 1A (n =  
480 20 cells;  $\pm$ SD (error bars)).

481 (C) Fluorescence microscopy of mixed population of cells expressing select mNG-tagged  
482 proteins in trans. Myr-treated cells express Vph1-mCherry as a vacuolar marker to  
483 distinguish from mock-treated unlabeled cells.

484 (D) Mean fluorescence intensity of mNG signal at the PM of cells shown in Suppl. Fig. 1C (n  
485 = 20-30 cells;  $\pm$ SD (error bars)).

486

487

488 **Figure S3.** Myr inhibits the trafficking and vacuolar fusion of PM-derived lipids.

489 (A) Endocytic trafficking and vacuolar fusion of PM lipids in *S. cerevisiae* SEY6210 cells. PM  
490 is dyed with lipophilic FM4-64 (fluorescent red) and vacuolar membrane is marked with  
491 Vph1-mNG (fluorescent green). Yellow coloration indicates the colocalization of FM4-64  
492 and Vph1-mNG at the vacuole. After 1 h of Myr treatment, cells were washed and  
493 resuspended in fresh SCD media and the bulk PM lipid trafficking was visualized after 0,  
494 30, 60 min of incubation at 26°C.

495 (B) Quantification of Fm4-64/Vph1-mNG colocalization after treatment (0, 15, 30, 45 or 60  
496 min) with FM4-64. Colocalization expressed as Pearson's Correlation Coefficient values  
497 (n = 20 cells;  $\pm$ SD (error bars)) measured using softWorx (ver. 7.0.0).

498 (C) Fluorescence microscopy of Myr-treated *S. cerevisiae* BY4741 cells (4 hours) after 1 our  
499 incubation with FM4-64.

500 (D) Quantification of Fm4-64/Vph1-mNG colocalization on Myr-treated cells (Suppl. Fig. 3C)  
501 after incubation with FM4-64 for 1 hour. Colocalization expressed as Pearson's  
502 Correlation Coefficient values (n = 30 cells;  $\pm$ SD (error bars)) measured using softWorx  
503 (ver. 7.0.0).

504

505

506 **Figure S4.** Myr increases the transcript and protein levels of most arrestin proteins.

507 (A) Transcript levels of arrestins in Myr-treated cells as determined by RNAseq.

508 (B) Transcript levels of ART1, ART2, ART4, and ART7 in cells treated with or without Myr as  
509 determined by RNAseq.

510 (C) Myr increases the fluorescence of mNG-tagged arrestin proteins, except Art4.

511

512



- 513 **Figure S5.** Myr-stimulated trafficking of Mup1 is Gcn2-independent.  
514 Flow cytometry analysis of wildtype or  $\Delta gcn2$  cells expressing Mup1-pHluorin in media  
515 with or without myriocin.  
516
- 517 **Figure S6.** Analysis of endocytic adaptor localization in response to sphingolipid depletion.  
518 (A) Fluorescence microscopy of cells showing the increase of Ent1-, Ent2-, and Ede1-mNG  
519 fluorescence at the periphery of the plasma membrane after 5 hours of Myr treatment.  
520 (B) Colocalization of Ede1-mCh with select mNG-tagged PM integral proteins after 5 hours  
521 with or without Myr treatment.  
522 (C) Flow cytometry analysis of cells expressing Mup1-pHluorin in media with or without  
523 methionine.  
524  
525

526 **Acknowledgements**

527           We are grateful to T Graham, A Ebert, and S Qualls-Histed for advice and helpful  
528 discussions. RCD was supported by NIH grant R56 AG024377 (to RCD). NLH and JAM were  
529 supported by NIH grant R35 GM144112 (to JAM).

530

531 **Author contributions**

532 Conceptualization, N.L.H., R.C.D. and J.A.M.; Methodology, N.L.H., R.C.D. and J.A.M.;  
533 Investigation, N.L.H., B.M., R.C.D. and J.A.M.; Resources, R.C.D. and J.A.M.; Writing – Original  
534 Draft, N.L.H. and J.A.M.; Writing – Review & Editing, N.L.H., B.M., R.C.D. and J.A.M.

535

536 **Declaration of interests**

537 The authors declare no conflicts of interest.

538

## 539 References

- 540 1. Körner C, Fröhlich F. Compartmentation and functions of sphingolipids. *Curr Opin Cell Biol.*  
541 2022;74:104-11. Epub 20220225. doi: 10.1016/j.ceb.2022.01.006. PubMed PMID: 35228099.
- 542 2. Deng Y, Pakdel M, Blank B, Sundberg EL, Burd CG, von Blume J. Activity of the SPCA1 Calcium  
543 Pump Couples Sphingomyelin Synthesis to Sorting of Secretory Proteins in the Trans-Golgi Network. *Dev*  
544 *Cell.* 2018;47(4):464-78.e8. Epub 20181101. doi: 10.1016/j.devcel.2018.10.012. PubMed PMID:  
545 30393074; PubMed Central PMCID: PMC6261503.
- 546 3. Sundberg EL, Deng Y, Burd CG. Syndecan-1 Mediates Sorting of Soluble Lipoprotein Lipase with  
547 Sphingomyelin-Rich Membrane in the Golgi Apparatus. *Dev Cell.* 2019;51(3):387-98.e4. Epub 20190919.  
548 doi: 10.1016/j.devcel.2019.08.014. PubMed PMID: 31543446; PubMed Central PMCID:  
549 PMC6832887.
- 550 4. Cartier A, Hla T. Sphingosine 1-phosphate: Lipid signaling in pathology and therapy. *Science.*  
551 2019;366(6463). doi: 10.1126/science.aar5551. PubMed PMID: 31624181; PubMed Central PMCID:  
552 PMC67661103.
- 553 5. Berchtold D, Piccolis M, Chiaruttini N, Riezman I, Riezman H, Roux A, et al. Plasma membrane  
554 stress induces relocalization of Slm proteins and activation of TORC2 to promote sphingolipid synthesis.  
555 *Nat Cell Biol.* 2012;14(5):542-7. Epub 20120415. doi: 10.1038/ncb2480. PubMed PMID: 22504275.
- 556 6. Kalinichenko LS, Gulbins E, Kornhuber J, Müller CP. Sphingolipid control of cognitive functions in  
557 health and disease. *Prog Lipid Res.* 2022;86:101162. Epub 20220319. doi: 10.1016/j.plipres.2022.101162.  
558 PubMed PMID: 35318099.
- 559 7. Janneh AH, Ogretmen B. Targeting Sphingolipid Metabolism as a Therapeutic Strategy in Cancer  
560 Treatment. *Cancers (Basel).* 2022;14(9). Epub 20220427. doi: 10.3390/cancers14092183. PubMed PMID:  
561 35565311; PubMed Central PMCID: PMC69104917.
- 562 8. Bataller M, Sánchez-García A, Garcia-Mayea Y, Mir C, Rodriguez I, Lleonart ME. The Role of  
563 Sphingolipids Metabolism in Cancer Drug Resistance. *Front Oncol.* 2021;11:807636. Epub 20211223. doi:  
564 10.3389/fonc.2021.807636. PubMed PMID: 35004331; PubMed Central PMCID: PMC68733468.
- 565 9. Huang X, Withers BR, Dickson RC. Sphingolipids and lifespan regulation. *Biochim Biophys Acta.*  
566 2014;1841(5):657-64. Epub 20130815. doi: 10.1016/j.bbali.2013.08.006. PubMed PMID: 23954556;  
567 PubMed Central PMCID: PMC3925463.
- 568 10. Glaros EN, Kim WS, Garner B. Myriocin-mediated up-regulation of hepatocyte apoA-I synthesis is  
569 associated with ERK inhibition. *Clin Sci (Lond).* 2010;118(12):727-36. Epub 2010/01/28. doi: CS20090452  
570 [pii]  
571 10.1042/CS20090452. PubMed PMID: 20102334; PubMed Central PMCID: PMC2860698.
- 572 11. Jiang XC, Goldberg IJ, Park TS. Sphingolipids and cardiovascular diseases: lipoprotein metabolism,  
573 atherosclerosis and cardiomyopathy. *Adv Exp Med Biol.* 2011;721:19-39. Epub 2011/09/13. doi:  
574 10.1007/978-1-4614-0650-1\_2. PubMed PMID: 21910080.
- 575 12. Yu Z, Peng Q, Li S, Hao H, Deng J, Meng L, et al. Myriocin and d-PDMP ameliorate atherosclerosis  
576 in ApoE<sup>-/-</sup> mice via reducing lipid uptake and vascular inflammation. *Clin Sci (Lond).* 2020;134(5):439-58.  
577 Epub 2020/02/25. doi: 10.1042/CS20191028. PubMed PMID: 32091078.
- 578 13. Summers SA, Chaurasia B, Holland WL. Metabolic Messengers: ceramides. *Nat Metab.*  
579 2019;1(11):1051-8. Epub 2020/07/23. doi: 10.1038/s42255-019-0134-8. PubMed PMID: 32694860.
- 580 14. Aburasayn H, Al Batran R, Ussher JR. Targeting ceramide metabolism in obesity. *Am J Physiol*  
581 *Endocrinol Metab.* 2016;311(2):E423-35. Epub 2016/07/07. doi: 10.1152/ajpendo.00133.2016. PubMed  
582 PMID: 27382035.
- 583 15. Yaguchi M, Shibata S, Satomi Y, Hirayama M, Adachi R, Asano Y, et al. Antitumor activity of a novel  
584 and orally available inhibitor of serine palmitoyltransferase. *Biochem Biophys Res Commun.* 2017. doi:  
585 10.1016/j.bbrc.2017.01.075. PubMed PMID: 28108287.

- 586 16. Selwan EM, Finicle BT, Kim SM, Edinger AL. Attacking the supply wagons to starve cancer cells to  
587 death. *FEBS Lett.* 2016;590(7):885-907. doi: 10.1002/1873-3468.12121. PubMed PMID: 26938658;  
588 PubMed Central PMCID: PMCPCMC4833639.
- 589 17. Woo CY, Baek JY, Kim AR, Hong CH, Yoon JE, Kim HS, et al. Inhibition of Ceramide Accumulation in  
590 Podocytes by Myriocin Prevents Diabetic Nephropathy. *Diabetes Metab J.* 2019;44(4):581-91. Epub  
591 2019/11/09. doi: 10.4093/dmj.2019.0063. PubMed PMID: 31701696.
- 592 18. Appriou Z, Nay K, Pierre N, Saligaut D, Lefeuvre-Orfila L, Martin B, et al. Skeletal muscle ceramides  
593 do not contribute to physical-inactivity-induced insulin resistance. *Appl Physiol Nutr Metab.*  
594 2019;44(11):1180-8. Epub 2019/03/20. doi: 10.1139/apnm-2018-0850. PubMed PMID: 30889368.
- 595 19. Geekiyanage H, Upadhye A, Chan C. Inhibition of serine palmitoyltransferase reduces Abeta and  
596 tau hyperphosphorylation in a murine model: a safe therapeutic strategy for Alzheimer's disease.  
597 *Neurobiol Aging.* 2013;34(8):2037-51. Epub 2013/03/27. doi: S0197-4580(13)00063-8 [pii]  
598 10.1016/j.neurobiolaging.2013.02.001. PubMed PMID: 23528227; PubMed Central PMCID: PMC3651806.
- 599 20. Petit CS, Lee JJ, Boland S, Swarup S, Christiano R, Lai ZW, et al. Inhibition of sphingolipid synthesis  
600 improves outcomes and survival in GARP mutant wobbler mice, a model of motor neuron degeneration.  
601 *Proc Natl Acad Sci USA.* 2020;117(19):10565-74. Epub 2020/04/30. doi: 10.1073/pnas.1913956117.  
602 PubMed PMID: 32345721; PubMed Central PMCID: PMCPCMC7229683.
- 603 21. Lin G, Wang L, Marcogliese PC, Bellen HJ. Sphingolipids in the Pathogenesis of Parkinson's Disease  
604 and Parkinsonism. *Trends Endocrinol Metab.* 2019;30(2):106-17. Epub 2018/12/12. doi:  
605 10.1016/j.tem.2018.11.003. PubMed PMID: 30528460.
- 606 22. Hepowit NL, Macedo JKA, Young LEA, Liu K, Sun RC, MacGurn JA, et al. Enhancing lifespan of  
607 budding yeast by pharmacological lowering of amino acid pools. *Aging (Albany NY).* 2021;13(6):7846-71.  
608 Epub 20210321. doi: 10.18632/aging.202849. PubMed PMID: 33744865; PubMed Central PMCID:  
609 PMCPCMC8034917.
- 610 23. Prosser DC, Whitworth K, Wendland B. Quantitative analysis of endocytosis with cytoplasmic  
611 pHluorin chimeras. *Traffic.* 2010;11(9):1141-50. doi: 10.1111/j.1600-0854.2010.01088.x. PubMed PMID:  
612 20626707; PubMed Central PMCID: PMCPCMC2919640.
- 613 24. Lee S, Ho HC, Tumolo JM, Hsu PC, MacGurn JA. Methionine triggers Ppz-mediated  
614 dephosphorylation of Art1 to promote cargo-specific endocytosis. *J Cell Biol.* 2019. Epub 2019/01/04. doi:  
615 10.1083/jcb.201712144. PubMed PMID: 30610170.
- 616 25. Lauwers E, Erpapazoglou Z, Haguenaer-Tsapis R, André B. The ubiquitin code of yeast permease  
617 trafficking. *Trends Cell Biol.* 2010;20(4):196-204. doi: 10.1016/j.tcb.2010.01.004. PubMed PMID:  
618 20138522.
- 619 26. Kahlhofer J, Leon S, Teis D, Schmidt O. The  $\alpha$ -arrestin family of ubiquitin ligase adaptors links  
620 metabolism with selective endocytosis. *Biol Cell.* 2021;113(4):183-219. Epub 20210201. doi:  
621 10.1111/boc.202000137. PubMed PMID: 33314196.
- 622 27. Lin CH, MacGurn JA, Chu T, Stefan CJ, Emr SD. Arrestin-related ubiquitin-ligase adaptors regulate  
623 endocytosis and protein turnover at the cell surface. *Cell.* 2008;135(4):714-25. Epub 20081030. doi:  
624 10.1016/j.cell.2008.09.025. PubMed PMID: 18976803.
- 625 28. Hepowit NL, Blalock E, Lee S, MacGurn JA, Dickson RC. Myriocin remodels sphingolipids and  
626 modulates proteostasis networks to enhance longevity. *bioRxiv.* 2022:2022.05.20.492522. doi:  
627 10.1101/2022.05.20.492522.
- 628 29. MacGurn JA, Hsu PC, Smolka MB, Emr SD. TORC1 regulates endocytosis via Npr1-mediated  
629 phosphoinhibition of a ubiquitin ligase adaptor. *Cell.* 2011;147(5):1104-17. doi:  
630 10.1016/j.cell.2011.09.054. PubMed PMID: 22118465.
- 631 30. Ivashov V, Zimmer J, Schwabl S, Kahlhofer J, Weys S, Gstir R, et al. Complementary  $\alpha$ -arrestin-  
632 ubiquitin ligase complexes control nutrient transporter endocytosis in response to amino acids. *Elife.*

- 633 2020;9. Epub 20200803. doi: 10.7554/eLife.58246. PubMed PMID: 32744498; PubMed Central PMCID:  
634 PMCPMC7449699.
- 635 31. Guiney EL, Klecker T, Emr SD. Identification of the endocytic sorting signal recognized by the Art1-  
636 Rsp5 ubiquitin ligase complex. *Mol Biol Cell*. 2016;27(25):4043-54. Epub 2016/10/19. doi:  
637 10.1091/mbc.E16-08-0570. PubMed PMID: 27798240; PubMed Central PMCID: PMCPMC5156545.
- 638 32. Busto JV, Elting A, Haase D, Spira F, Kuhlman J, Schäfer-Herte M, et al. Lateral plasma membrane  
639 compartmentalization links protein function and turnover. *EMBO J*. 2018;37(16). Epub 20180705. doi:  
640 10.15252/embj.201899473. PubMed PMID: 29976762; PubMed Central PMCID: PMCPMC6092676.
- 641 33. Ghaddar K, Merhi A, Saliba E, Krammer EM, Prévost M, André B. Substrate-induced ubiquitylation  
642 and endocytosis of yeast amino acid permeases. *Mol Cell Biol*. 2014;34(24):4447-63. Epub 20140929. doi:  
643 10.1128/MCB.00699-14. PubMed PMID: 25266656; PubMed Central PMCID: PMCPMC4248734.
- 644 34. Stringer DK, Piper RC. A single ubiquitin is sufficient for cargo protein entry into MVBs in the  
645 absence of ESCRT ubiquitination. *J Cell Biol*. 2011;192(2):229-42. Epub 20110117. doi:  
646 10.1083/jcb.201008121. PubMed PMID: 21242292; PubMed Central PMCID: PMCPMC3172180.
- 647 35. Wrasman K, Alioto SL, Zhang Y, Hoban K, Khairy M, Goode BL, et al. A Flow Cytometry-Based  
648 Phenotypic Screen To Identify Novel Endocytic Factors in G3 (Bethesda). 2018;8(5):1497-512. Epub  
649 20180504. doi: 10.1534/g3.118.200102. PubMed PMID: 29540444; PubMed Central PMCID:  
650 PMCPMC5940143.
- 651 36. Sims JJ, Haririnia A, Dickinson BC, Fushman D, Cohen RE. Avid interactions underlie the Lys63-  
652 linked polyubiquitin binding specificities observed for UBA domains. *Nat Struct Mol Biol*. 2009;16(8):883-  
653 9. Epub 20090720. doi: 10.1038/nsmb.1637. PubMed PMID: 19620964; PubMed Central PMCID:  
654 PMCPMC2744598.
- 655 37. Huang X, Liu J, Dickson RC. Down-regulating sphingolipid synthesis increases yeast lifespan. *PLoS*  
656 *Genet*. 2012;8(2):e1002493. Epub 20120202. doi: 10.1371/journal.pgen.1002493. PubMed PMID:  
657 22319457; PubMed Central PMCID: PMCPMC3271065.
- 658 38. Lin CH, MacGurn JA, Chu T, Stefan CJ, Emr SD. Arrestin-related ubiquitin-ligase adaptors regulate  
659 endocytosis and protein turnover at the cell surface. *Cell*. 2008;135(4):714-25. doi: S0092-8674(08)01182-  
660 3 [pii]  
661 10.1016/j.cell.2008.09.025. PubMed PMID: 18976803.
- 662 39. MacDonald C, Payne JA, Aboian M, Smith W, Katzmann DJ, Piper RC. A family of tetraspans  
663 organizes cargo for sorting into multivesicular bodies. *Dev Cell*. 2015;33(3):328-42. doi:  
664 10.1016/j.devcel.2015.03.007. PubMed PMID: 25942624; PubMed Central PMCID: PMCPMC4421094.
- 665 40. Zou K, Rouskin S, Dervishi K, McCormick MA, Sasikumar A, Deng C, et al. Life span extension by  
666 glucose restriction is abrogated by methionine supplementation: Cross-talk between glucose and  
667 methionine and implication of methionine as a key regulator of life span. *Sci Adv*. 2020;6(32):eaba1306.  
668 Epub 20200805. doi: 10.1126/sciadv.aba1306. PubMed PMID: 32821821; PubMed Central PMCID:  
669 PMCPMC7406366.
- 670 41. Tumolo JM, Hepowitz NL, Joshi SS, MacGurn JA. A Snf1-related nutrient-responsive kinase  
671 antagonizes endocytosis in yeast. *PLoS Genet*. 2020;16(3):e1008677. Epub 20200319. doi:  
672 10.1371/journal.pgen.1008677. PubMed PMID: 32191698; PubMed Central PMCID: PMCPMC7176151.
- 673 42. Schindelin J, Arganda-Carreras I, Frise E, Kaynig V, Longair M, Pietzsch T, et al. Fiji: an open-source  
674 platform for biological-image analysis. *Nat Methods*. 2012;9(7):676-82. Epub 20120628. doi:  
675 10.1038/nmeth.2019. PubMed PMID: 22743772; PubMed Central PMCID: PMCPMC3855844.
- 676 43. Lee S, Ho HC, Tumolo JM, Hsu PC, MacGurn JA. Methionine triggers Ppz-mediated  
677 dephosphorylation of Art1 to promote cargo-specific endocytosis. *J Cell Biol*. 2019;218(3):977-92. Epub  
678 20190104. doi: 10.1083/jcb.201712144. PubMed PMID: 30610170; PubMed Central PMCID:  
679 PMCPMC6400557.

680 44. Hepowit NL, Pereira KN, Tumolo JM, Chazin WJ, MacGurn JA. Identification of ubiquitin Ser57  
681 kinases regulating the oxidative stress response in yeast. *Elife*. 2020;9. Epub 20201019. doi:  
682 10.7554/eLife.58155. PubMed PMID: 33074099; PubMed Central PMCID: PMC7647399.  
683

Figure 1

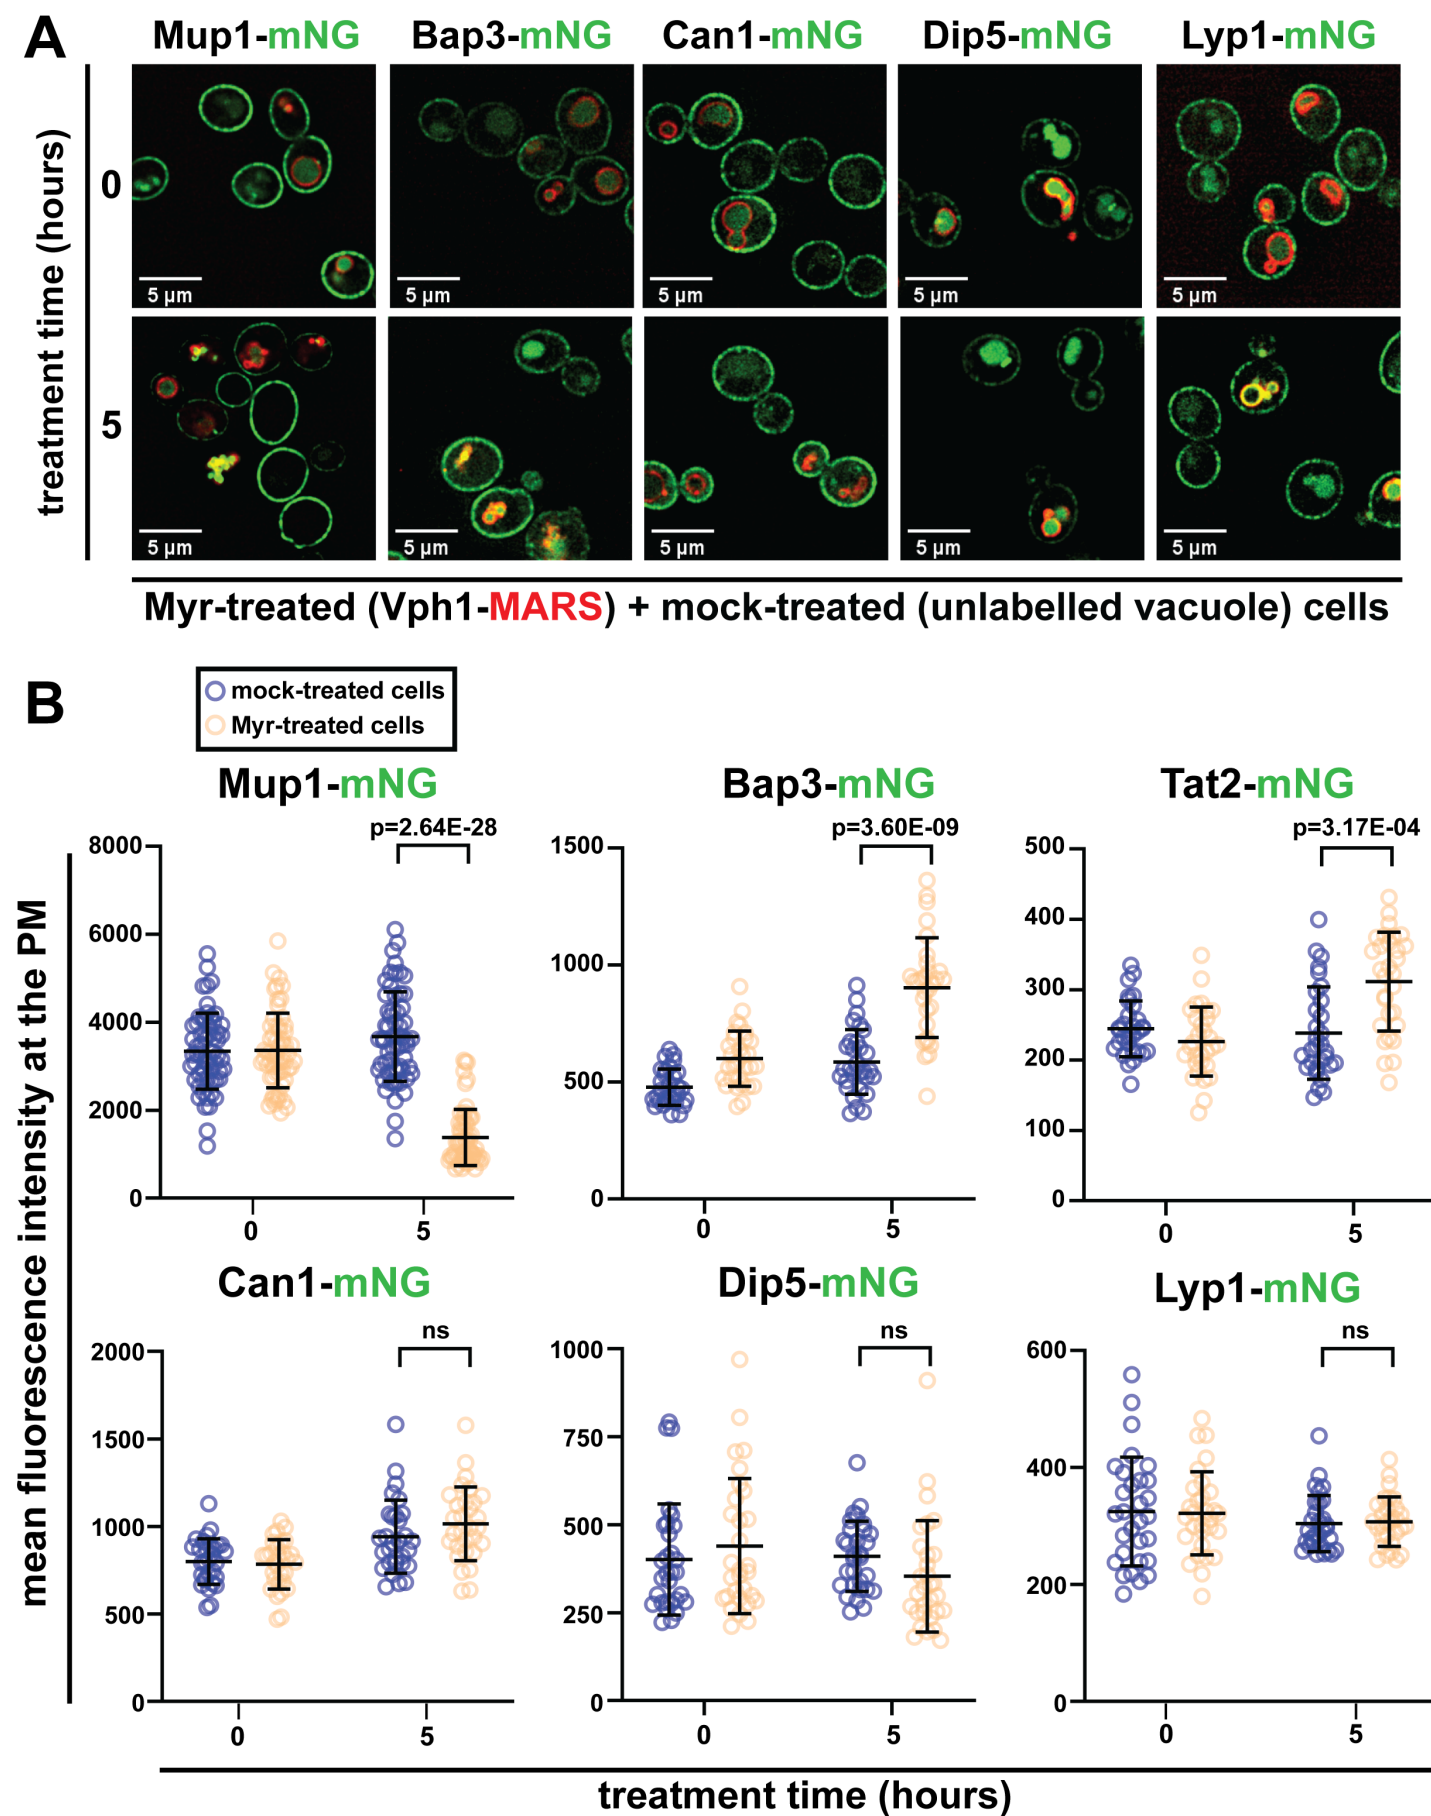



Figure 2

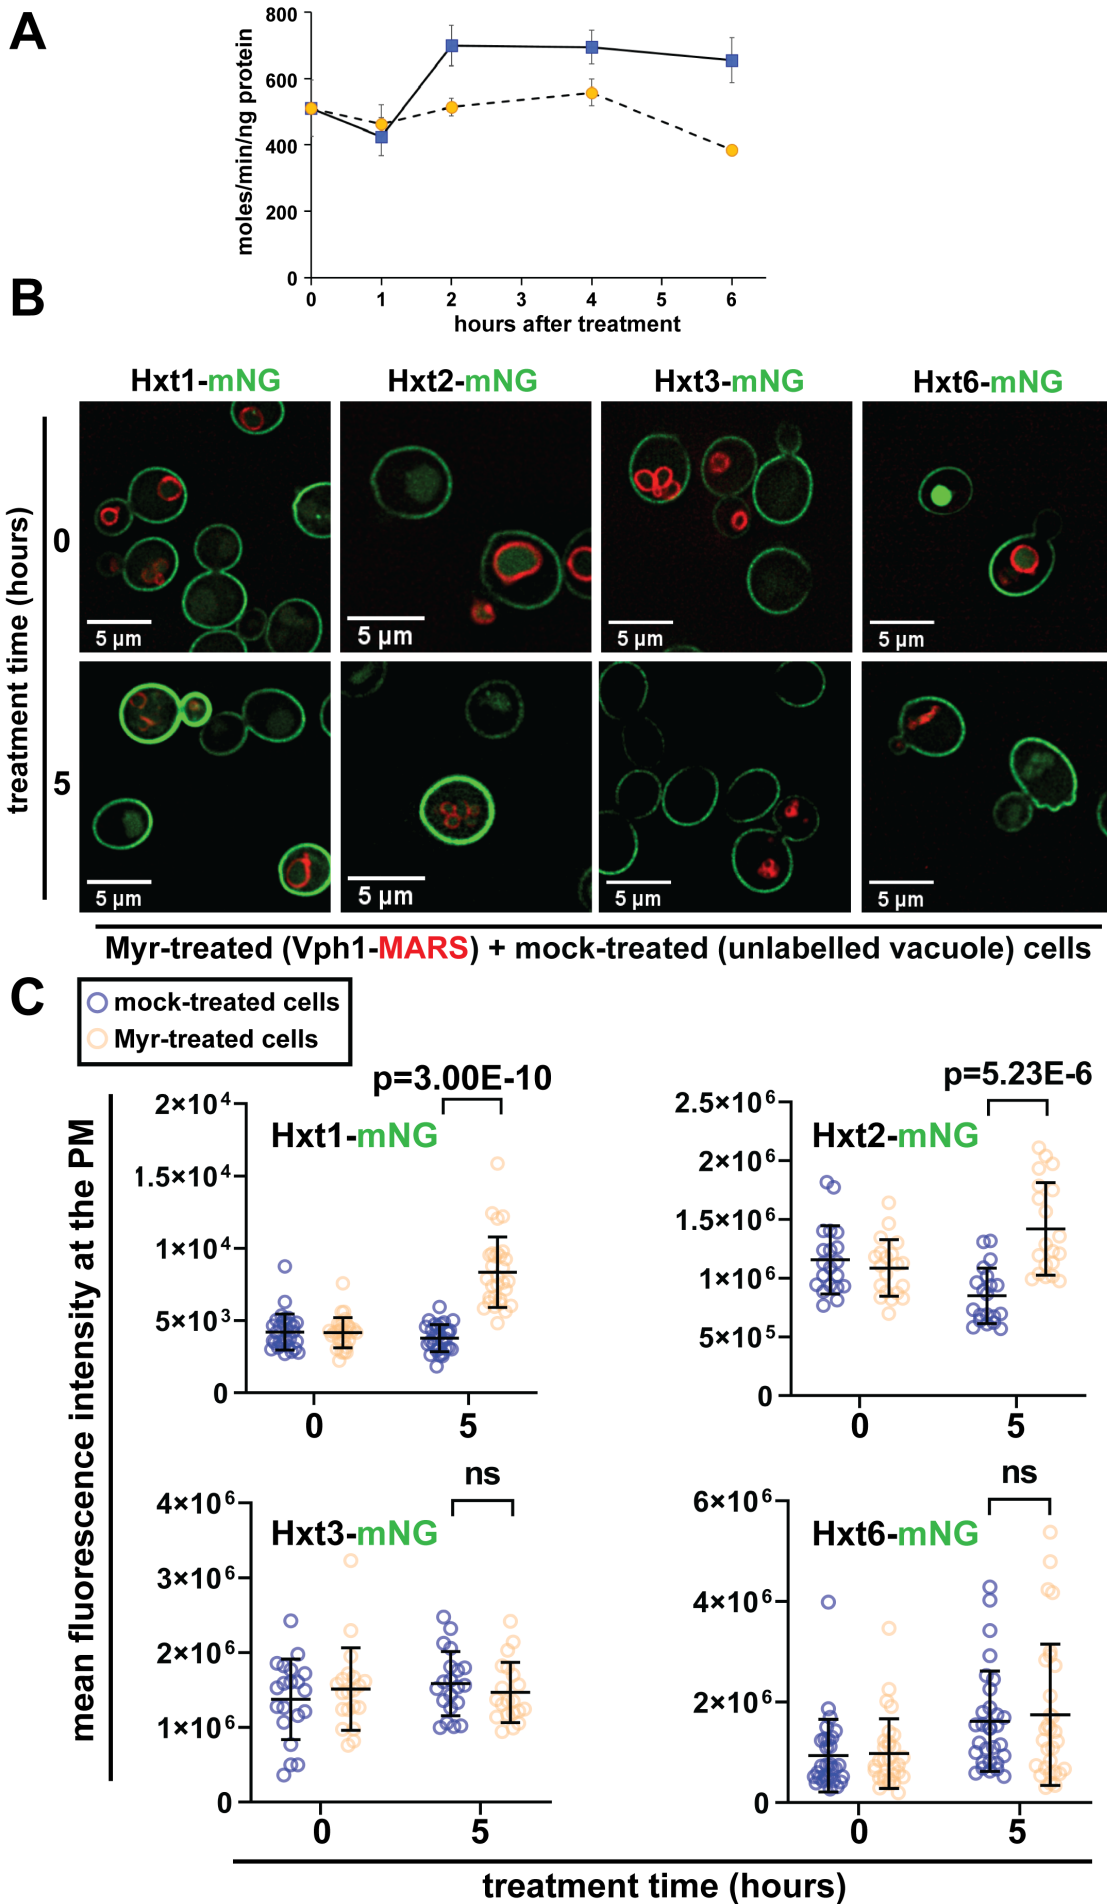



**Figure 3**

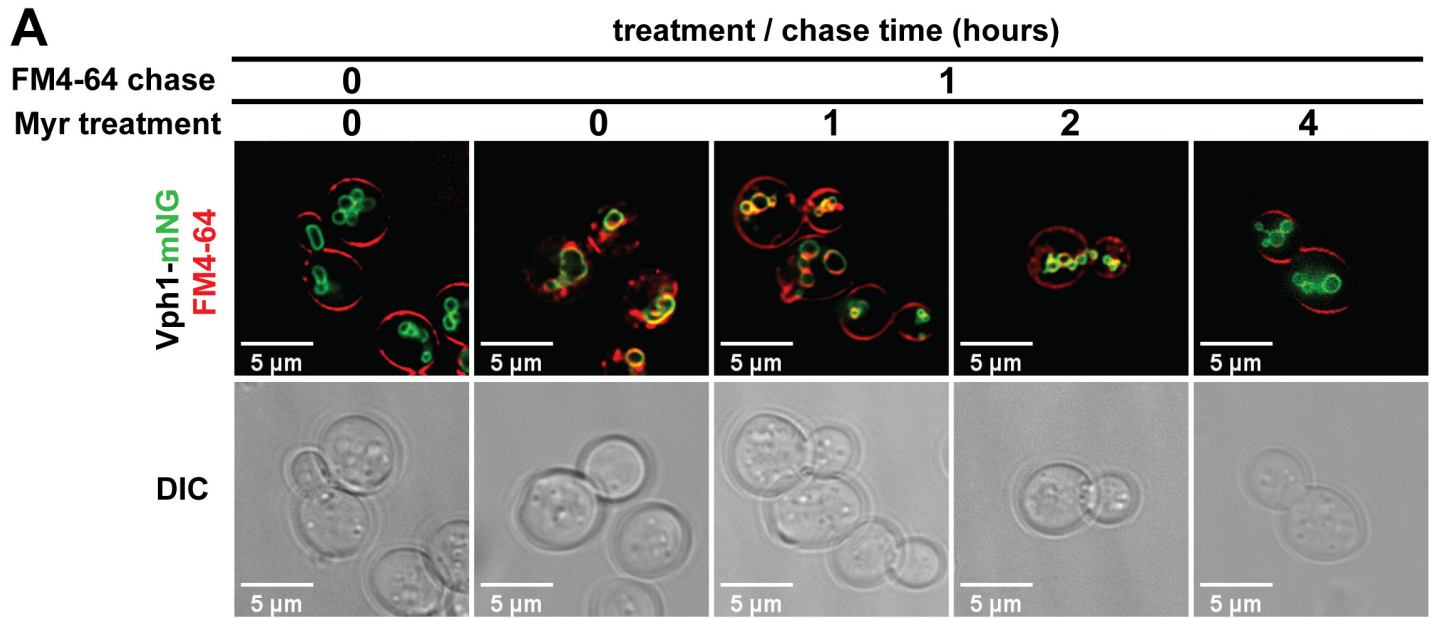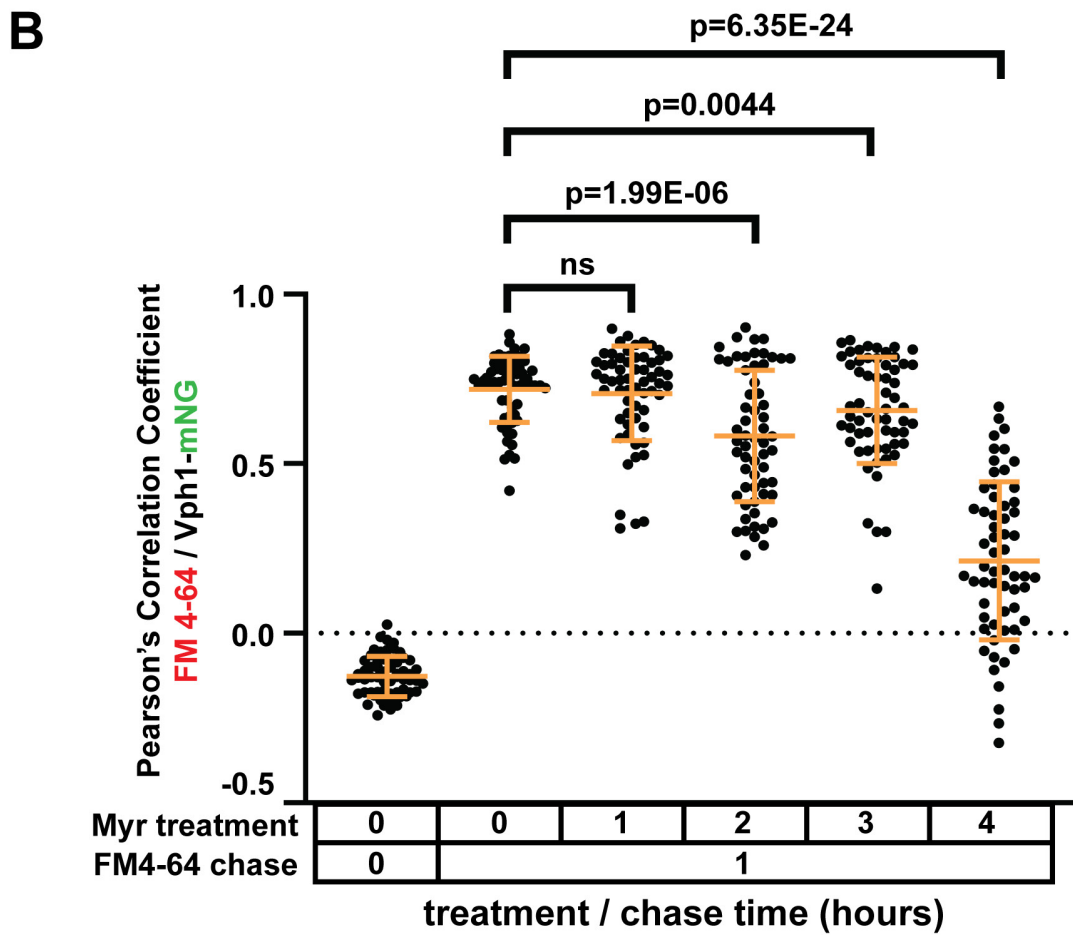

**Figure 4**

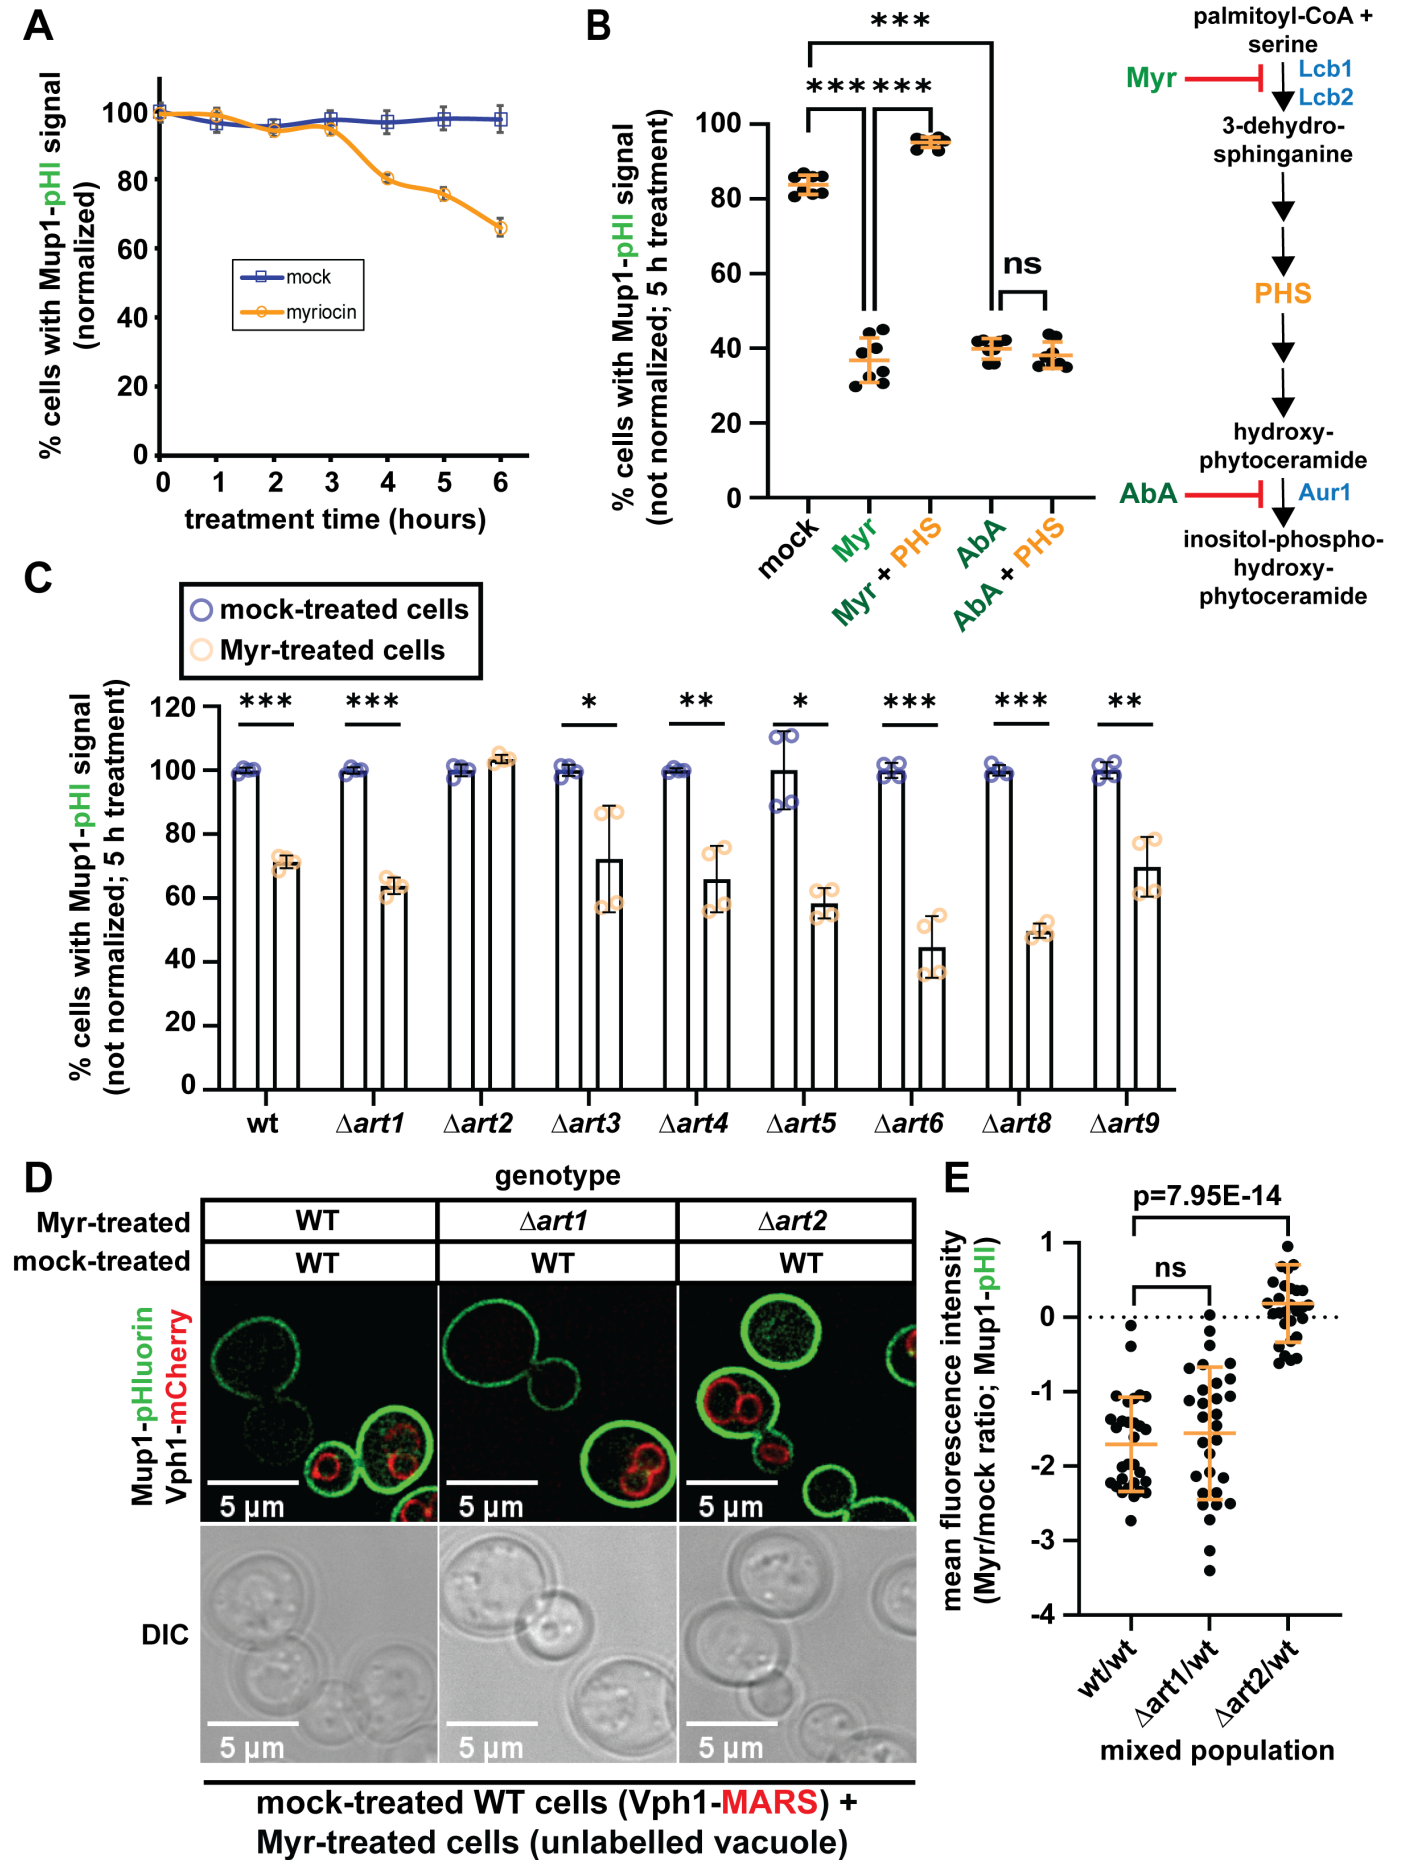

**Figure 5**

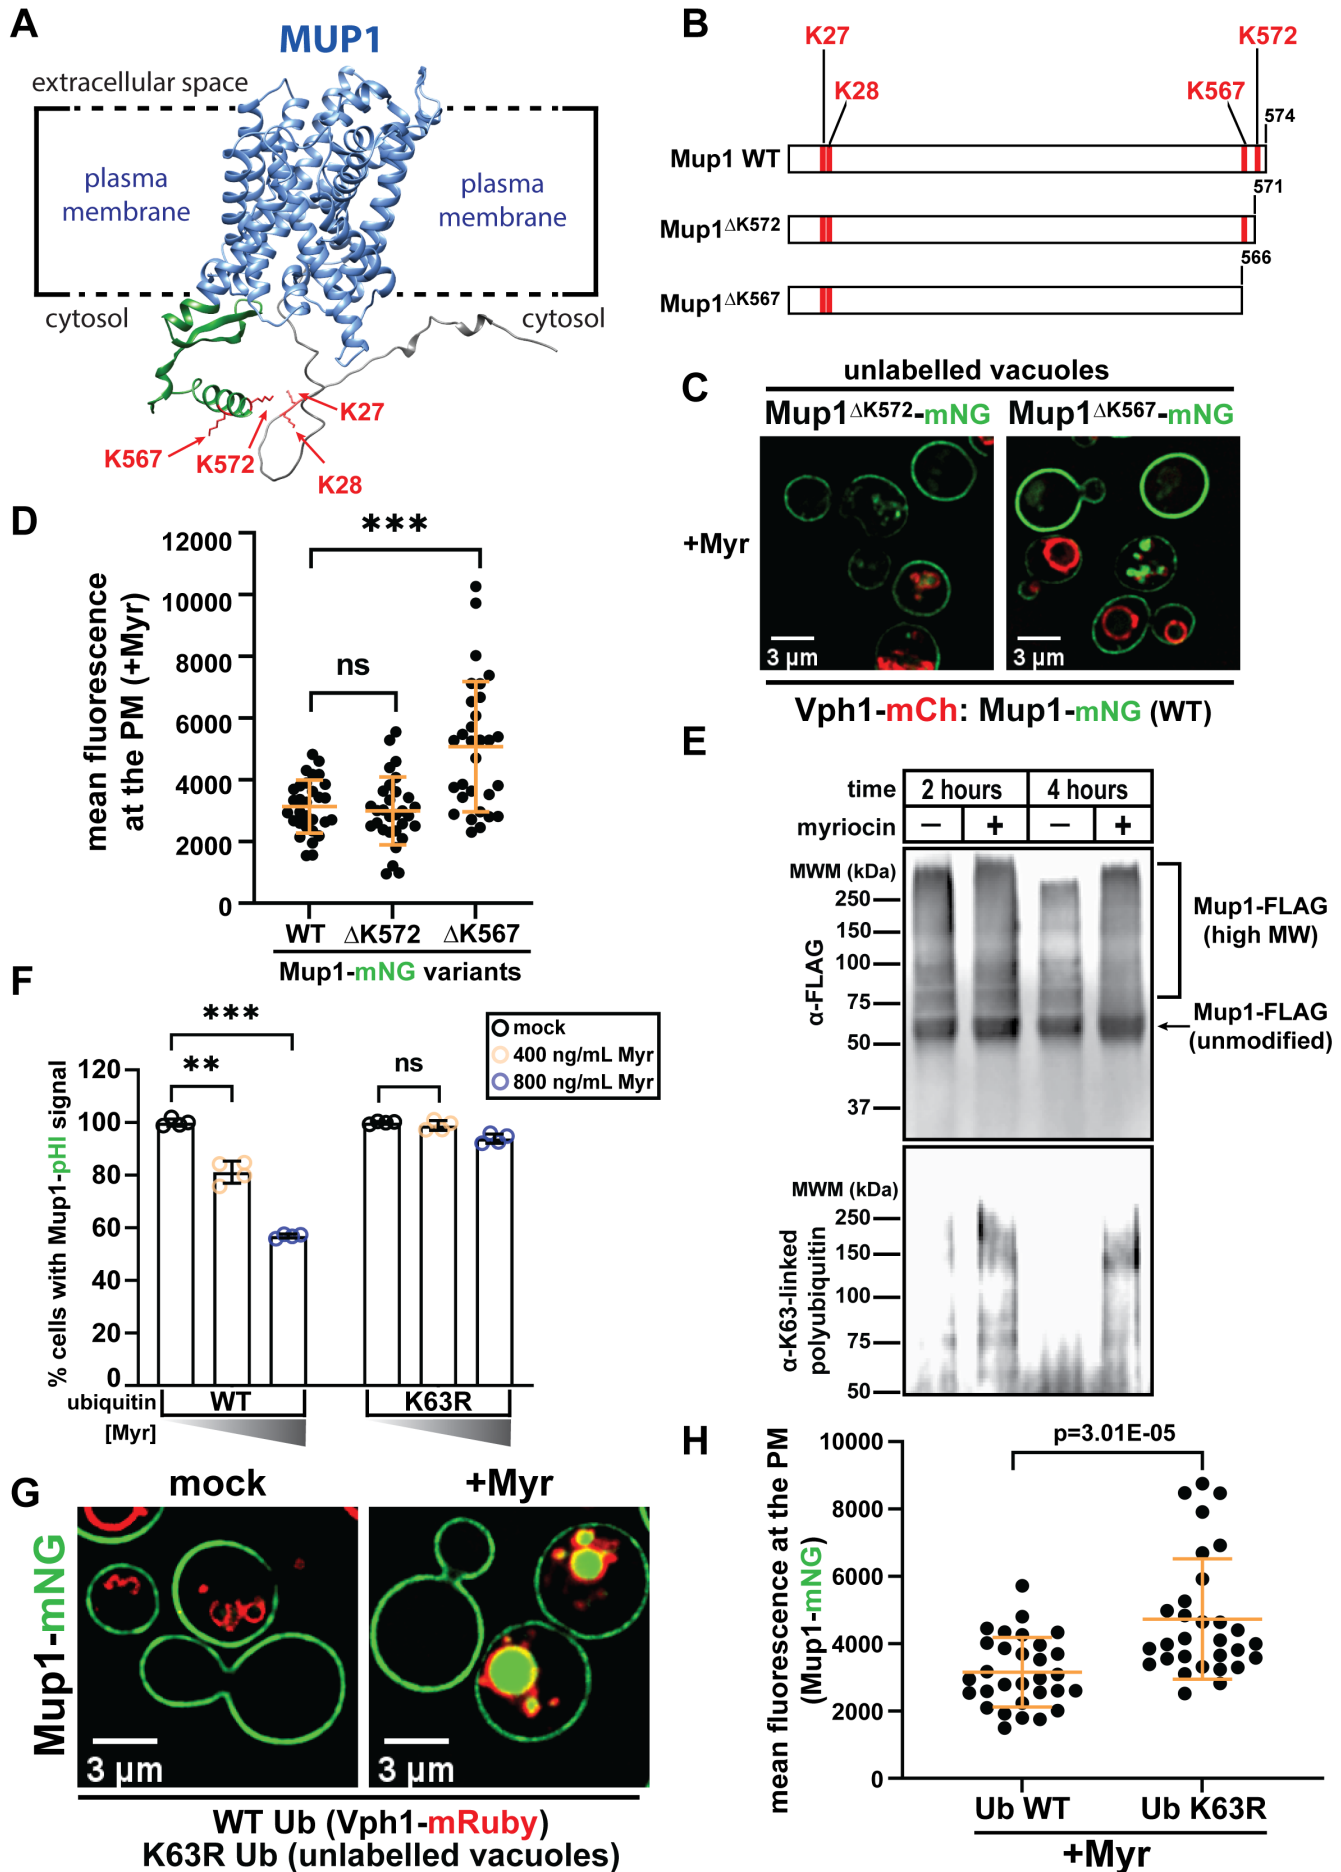

Figure 6

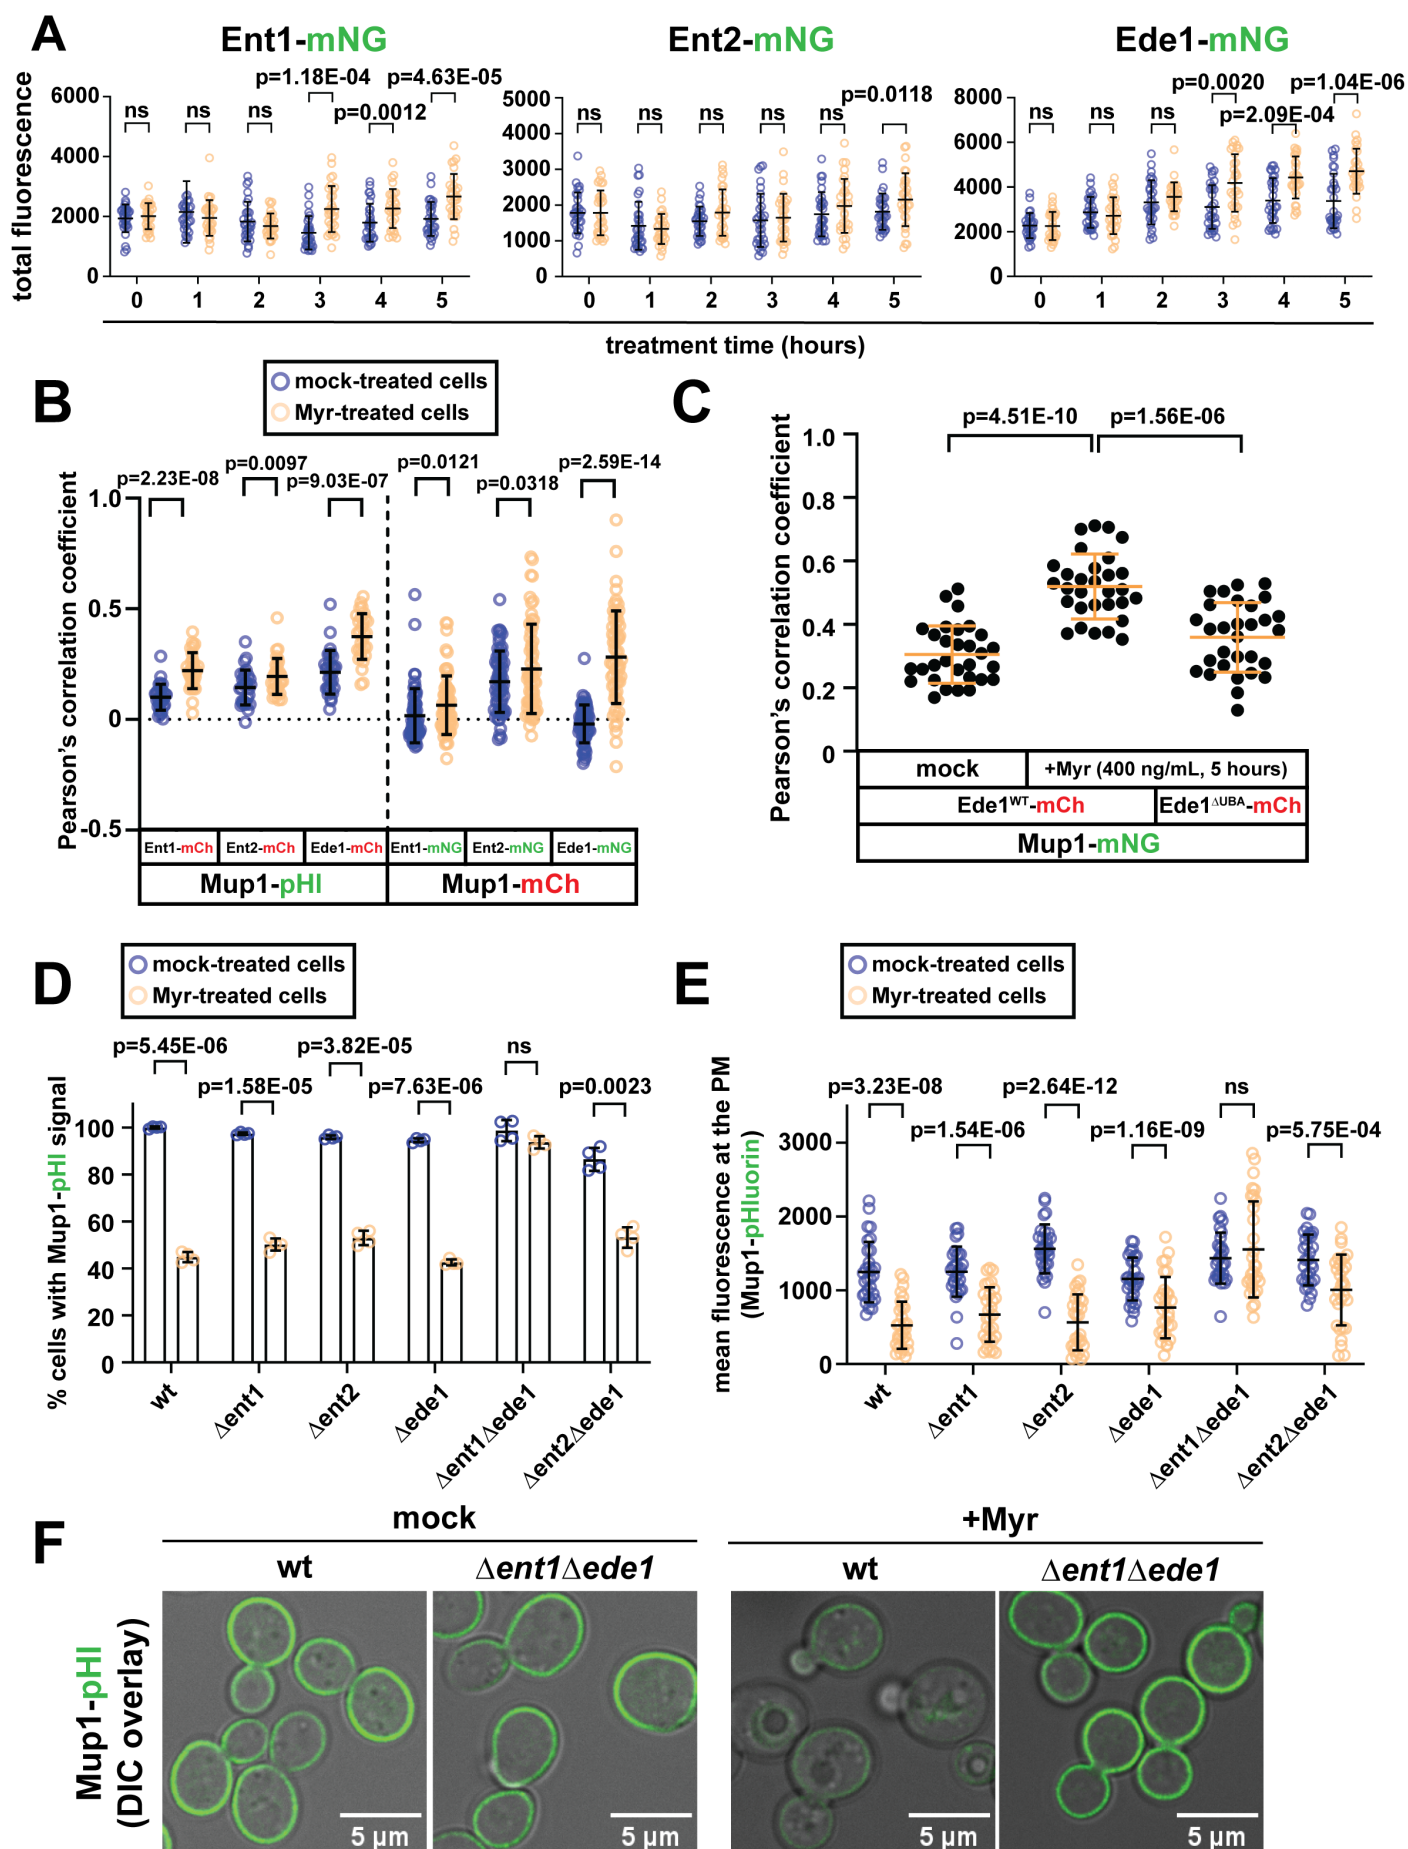

Figure 7

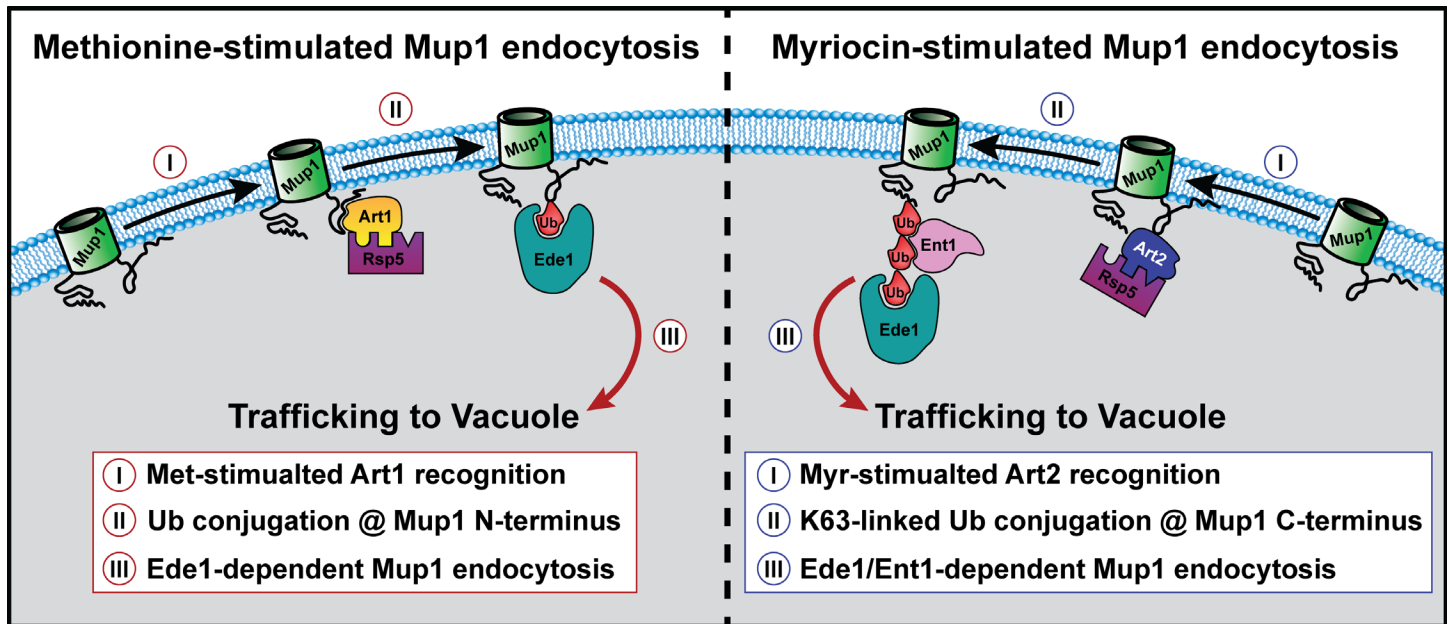



## Supplemental Figure 1

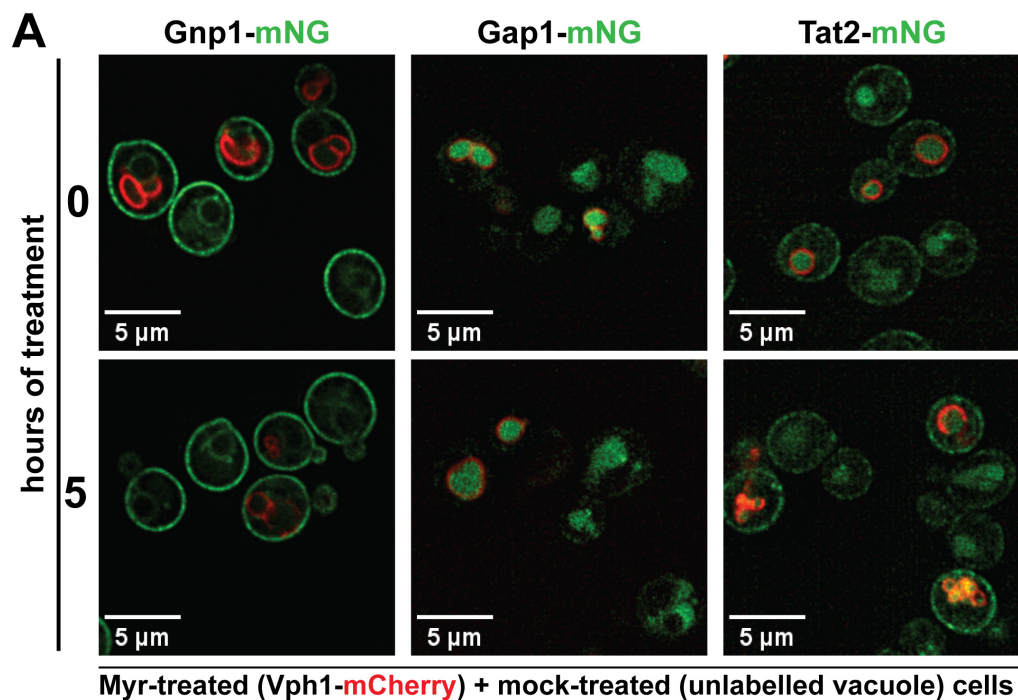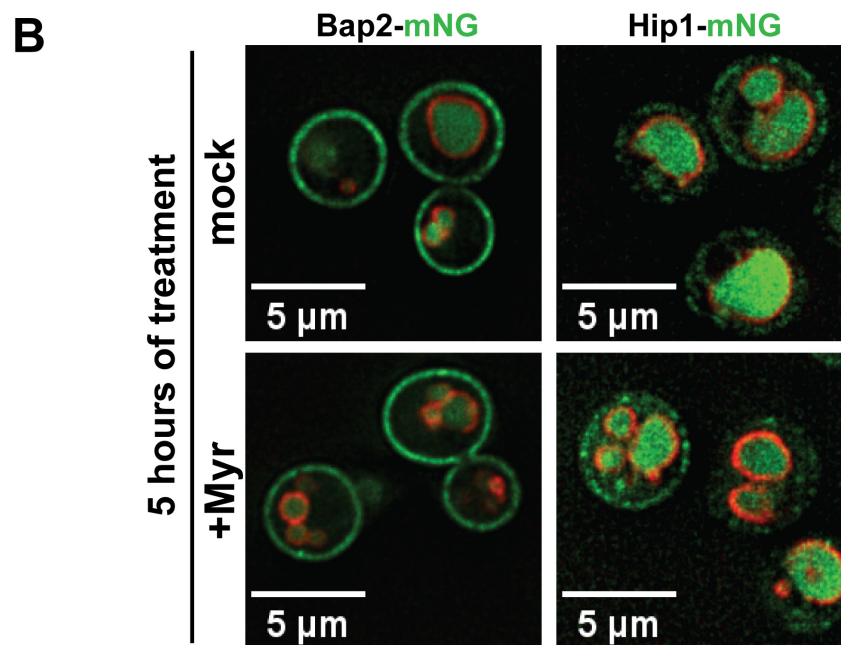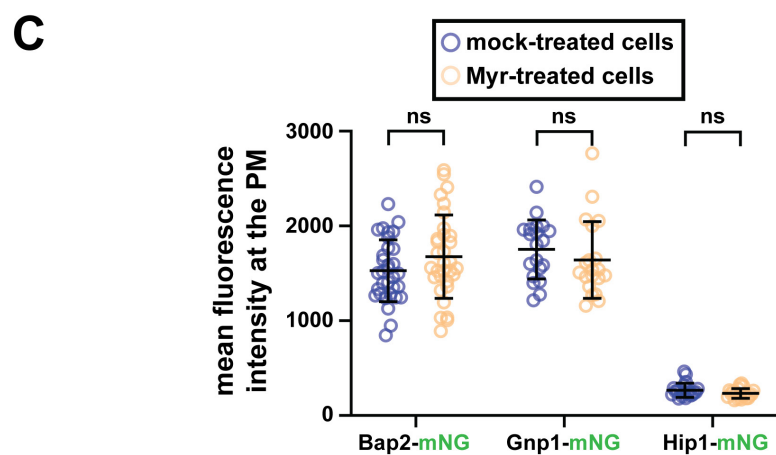



### Supplemental Figure 3

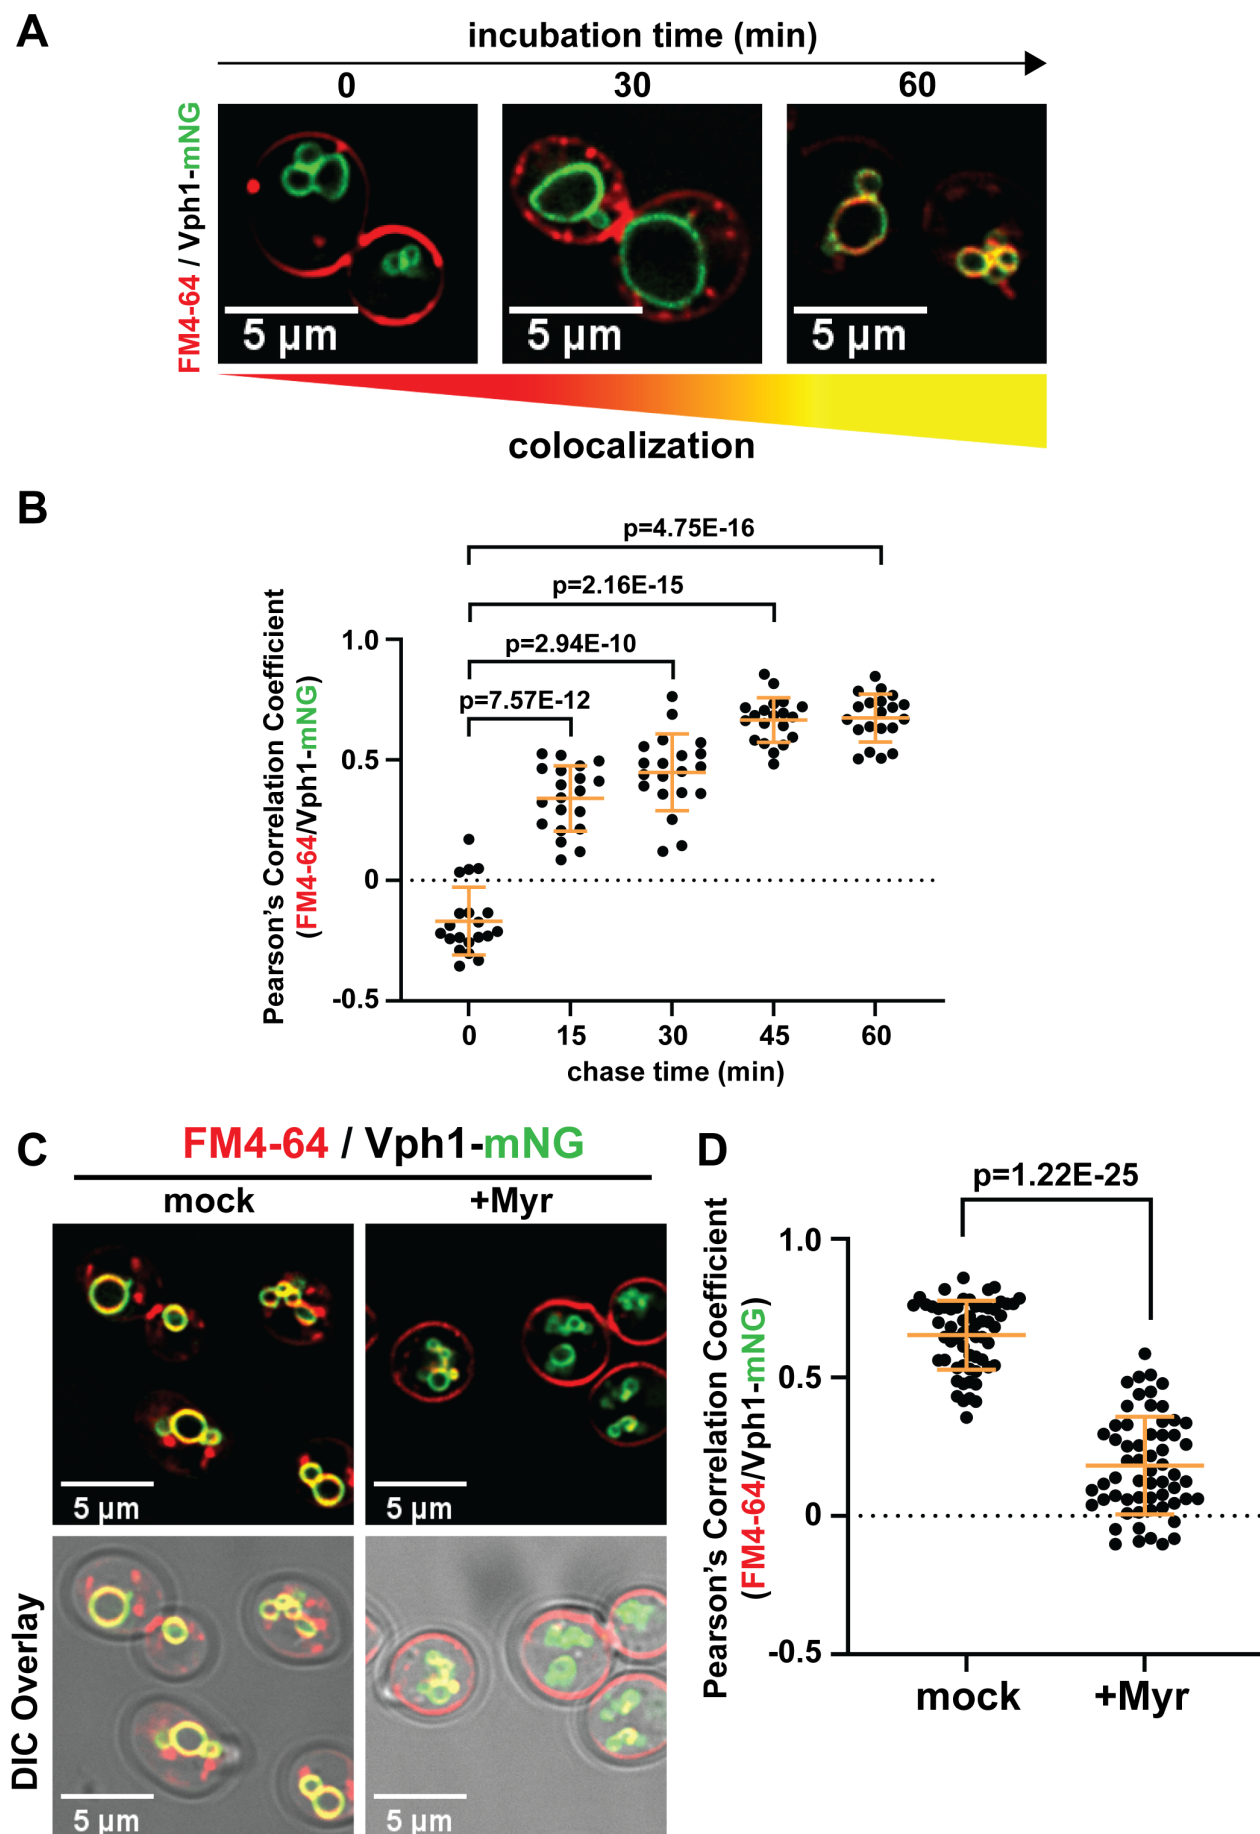



## Supplemental Figure 4

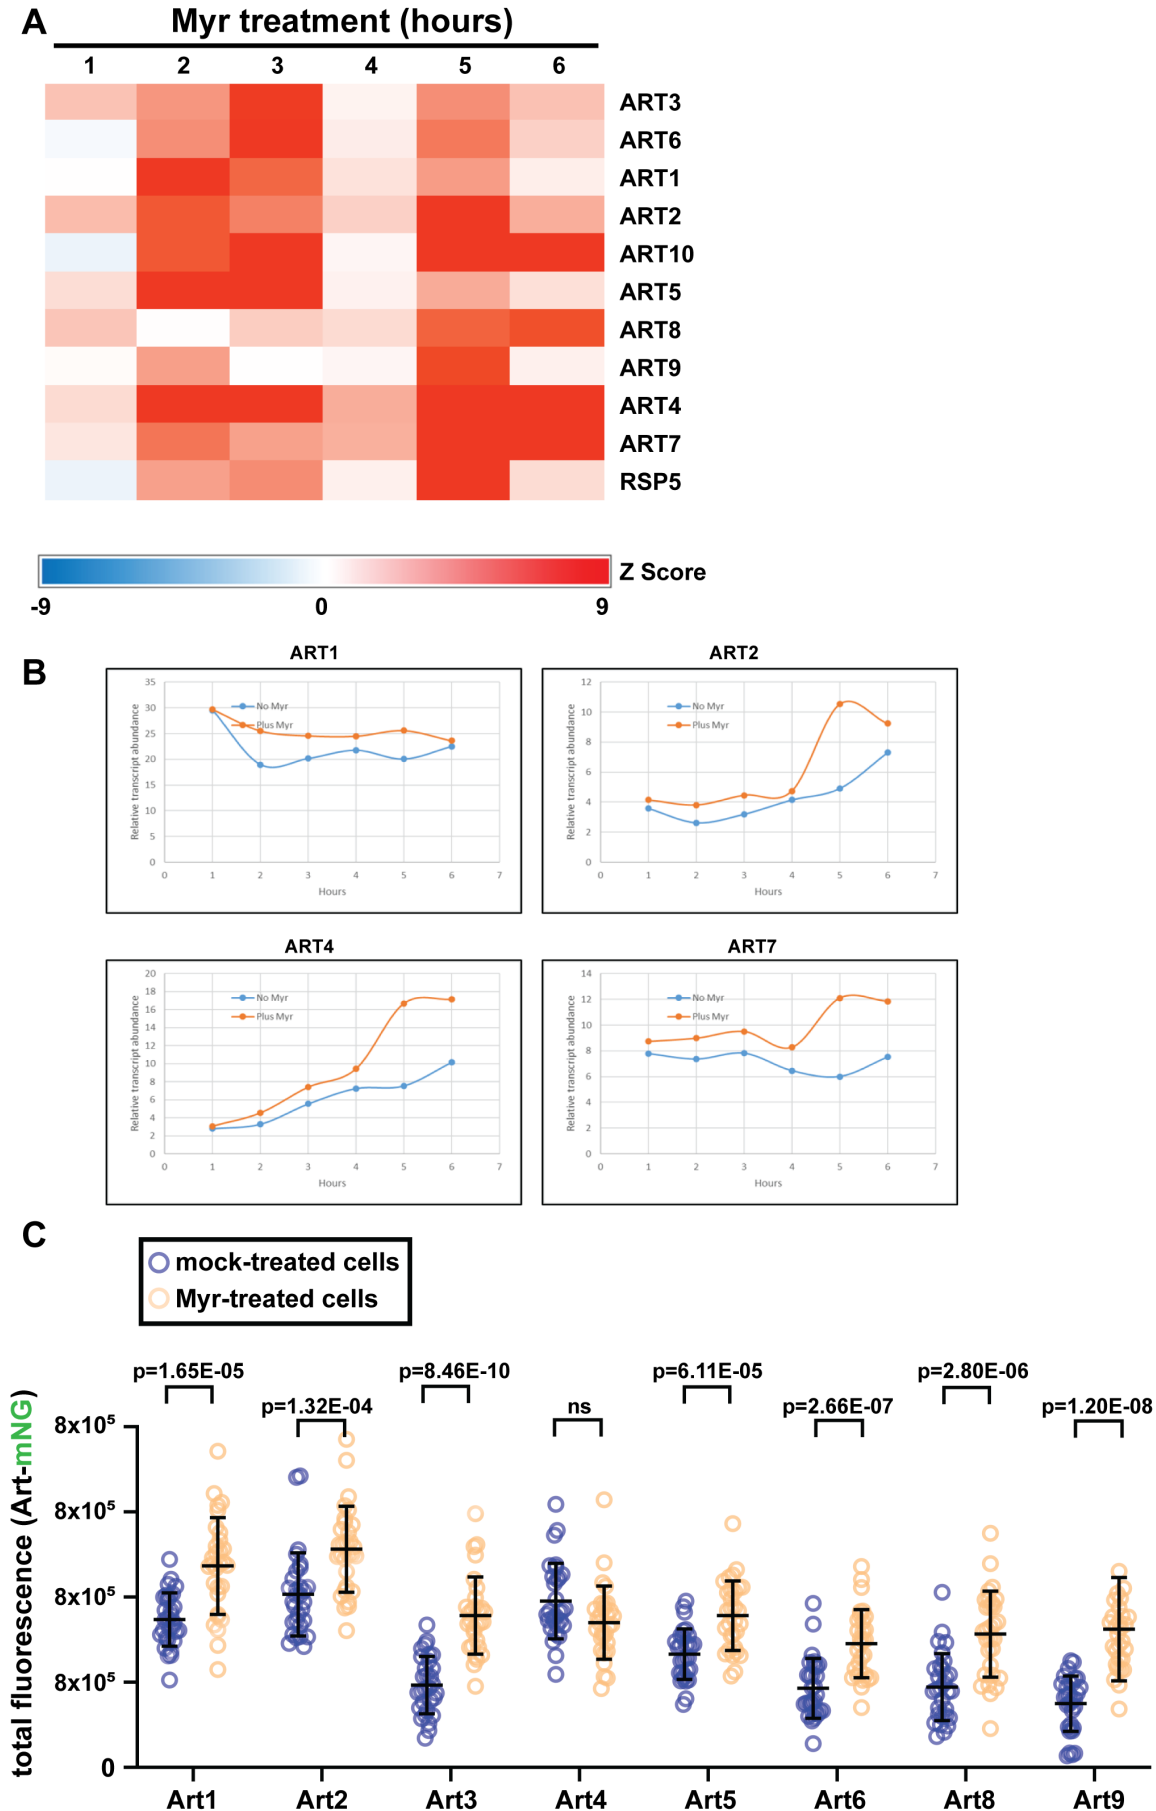

## Supplemental Figure 5

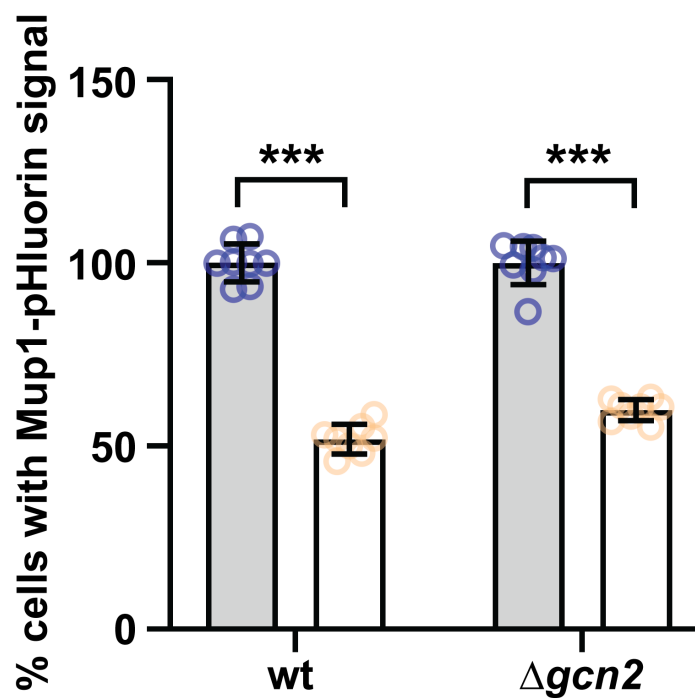

## Supplemental Figure 6

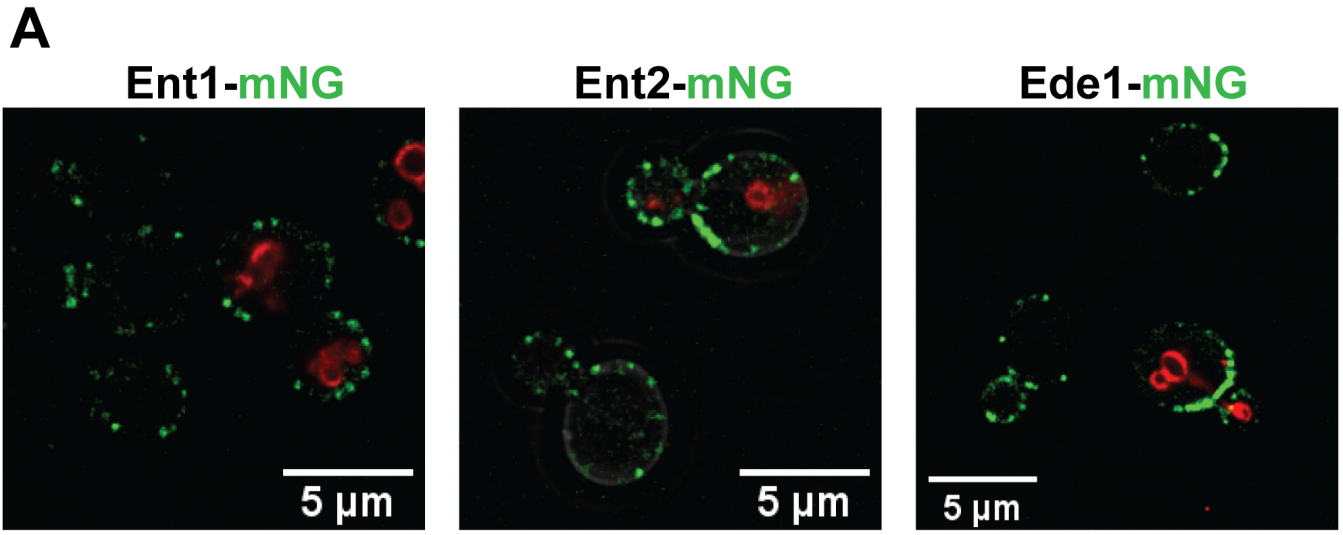

Myr-treated (Vph1-mCherry) + mock-treated (unlabelled vacuole) cells

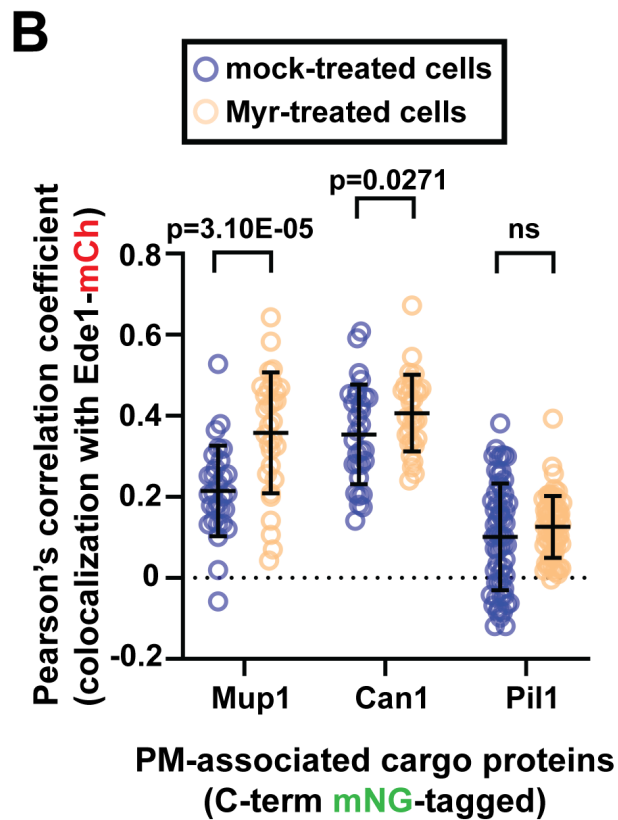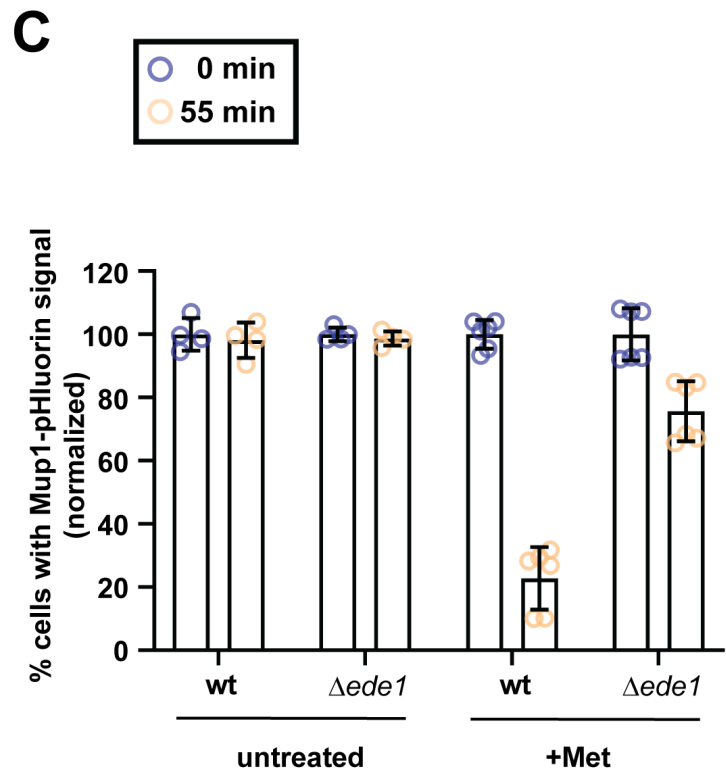

**Table 1.** Effect of myriocin on PM localization of nutrient transporters and other PM proteins. This table summarizes the microscopy-based localization data presented in Figure 1 and Figure 2 (and associated supplemental data). In cases where Myr treatment resulted in a significant change (P-value < 0.01 using Student's T-test when compared to mock-treated cells) the box corresponding to the magnitude change (% Effect) is shaded red or green to indicate the extent of decrease or increase (respectively) observed upon Myr treatment.

| Functional Classification | PM Protein | Description                                    | Response to Myriocin   |          |
|---------------------------|------------|------------------------------------------------|------------------------|----------|
|                           |            |                                                | % Effect               | P-value  |
| amino acid transporters   | Mup1       | transporter: Met                               | -62.44%                | 2.64E-28 |
|                           | Can1       | transporter: Arg                               | 7.93%                  | 0.0761   |
|                           | Dip5       | transporter: Asp, Glu, Gln, Asn, Ser, Gly, Ala | -13.87%                | 0.0558   |
|                           | Lyp1       | transporter: Lys                               | 1.07%                  | 0.3917   |
|                           | Bap3       | transporter: Cys, Leu, Ile and Val             | 54.15%                 | 3.60E-09 |
|                           | Tat2       | transporter: Trp and Tyr                       | 30.67%                 | 3.17E-04 |
|                           | Bap2       | transporter: Leu                               | 9.68%                  | 0.0575   |
|                           | Gnp1       | transporter: Ser, Leu, Thr, Cys, Met, Asn, Gln | -6.35%                 | 0.1868   |
|                           | Hip1       | transporter: His                               | -12.90%                | 0.0455   |
|                           | Gap1       | general amino acid transporter                 | n.d. (mostly vacuolar) |          |
| hexose transporters       | Hxt1       | glucose transporter (low affinity)             | 120.78%                | 3.00E-10 |
|                           | Hxt2       | glucose transporter (high affinity)            | 67.06%                 | 5.23E-06 |
|                           | Hxt3       | glucose transporter (low affinity)             | -0.07%                 | 0.2112   |
|                           | Hxt6       | glucose transporter (high affinity)            | 7.97%                  | 0.3144   |
| proton pumps              | Pma1       | proton pump                                    | -19.40%                | 0.0546   |
|                           | Pma2       | proton pump                                    | 24.31%                 | 0.0095   |
| other PM proteins         | Ste2       | receptor for alpha-factor pheromone            | 81.35%                 | 4.33E-11 |
|                           | Wsc1       | stress signaling transmembrane protein         | 217.11%                | 1.48E-12 |
|                           | Pdr5       | ABC family multidrug transporter               | 46.74%                 | 5.80E-06 |
